# Supplementary material for: High cortisol in 5-year-old children causes loss of DNA methylation in SINE retrotransposons: a possible role for ZNF263 in stress-related diseases
Source: PubMed Central journal article supplement (PMC4559301; doi:10.1186/s13148-015-0123-z), 2015-09-04
Supplement: 13148_2015_123_MOESM1_ESM.pdf [file 13148_2015_123_MOESM1_ESM.pdf]

# Index Supplemental Files

## 1. Supplemental figures

Fig. S1 - Individual methylation profiles over the PRDM14 gene.

Fig. S2 - Overlaps between DMRs and selected genomic features.

Fig. S3 - Bisulfite pyrosequencing results for the BRCA1 gene.

Fig. S4 - Variation analysis (using CV).

Fig. S5 - Raw frequencies of disease class representation and evidence for neuropsychiatric genes within the AGE class.

Fig. S6 - Gene ontology tree.

Fig. S7 - Candidate Zinc finger binding to repetitive sequences.

Fig. S8 - First exon versus last exon methylation.

## 2. Supplemental tables

Table. S1 - Some demographic and social data of the participating children.

Table. S2 - Summary of the main bioinformatics tools

Table. S3 - Differentially methylated regions in the whole genome analysis.

Table. S4 - A selection of the top results from the functional annotation analysis.

Table. S5 - Primers used for bisulfite pyrosequencing.

# **1. Supplemental figures**

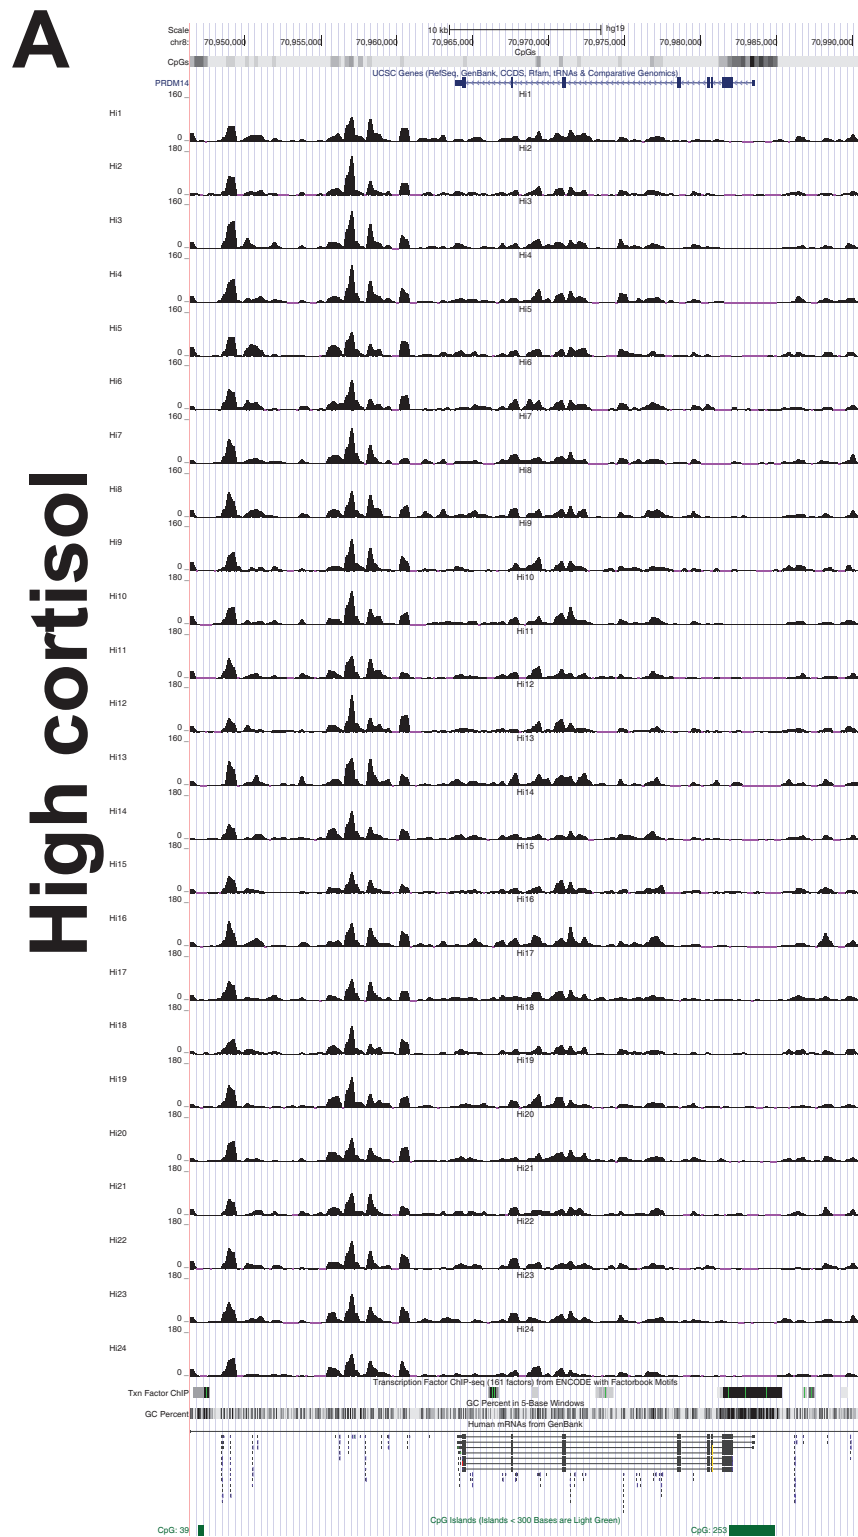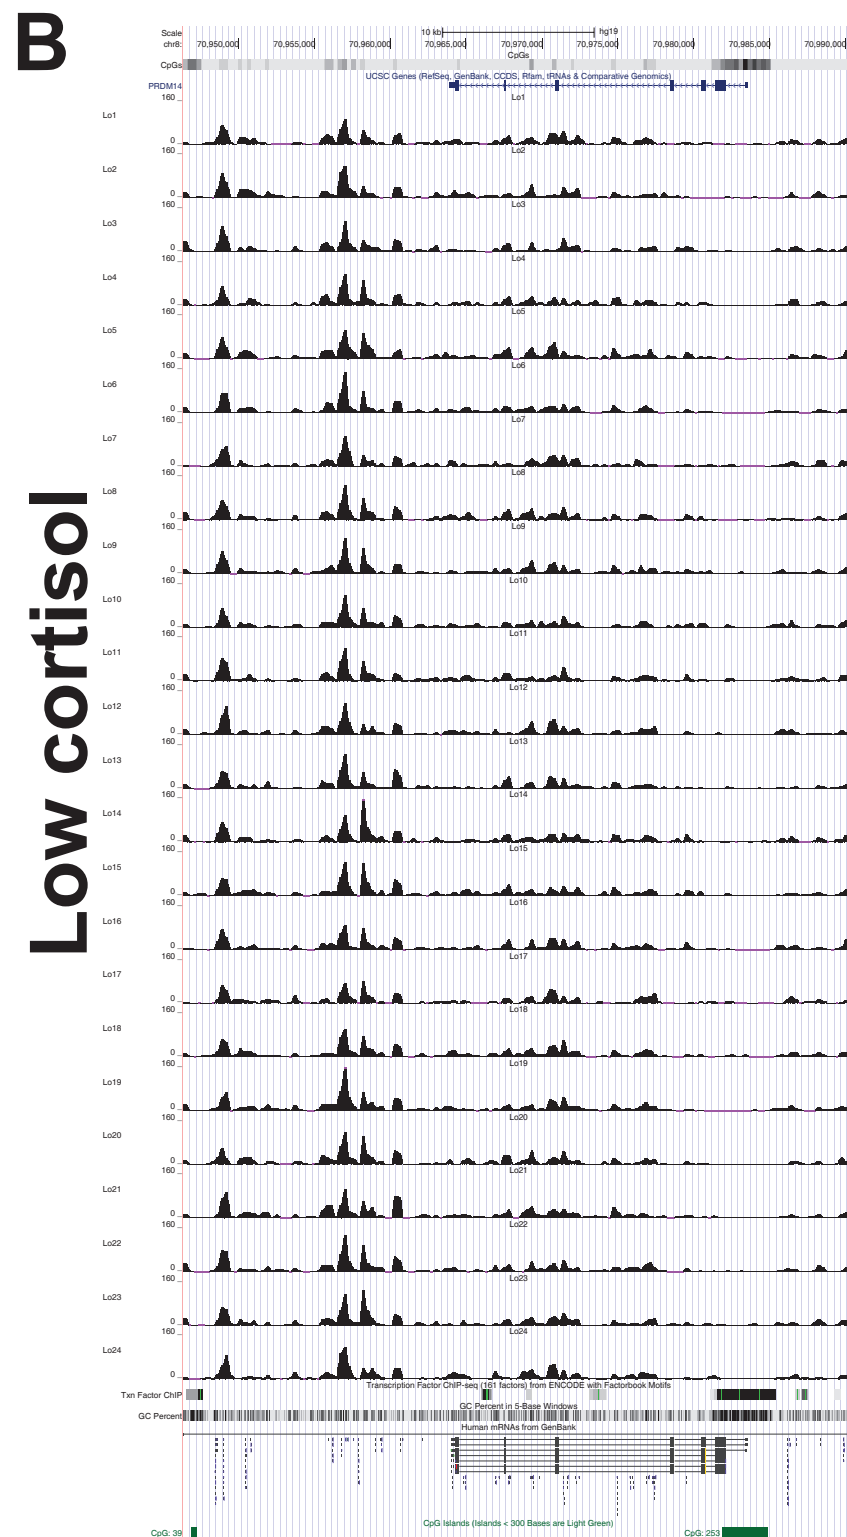

**Fig. S1. Individual methylation profiles over the *PRDM14* gene.** DNA methylation was measured in 300 bp windows. Top track shows relative CpG content in each window. For every methylation profile the Y-axis shows number of read counts, while the X-axis shows the position on chromosome 8 in bp. Graphs were generated and downloaded from UCSC genome browser custom tracks.

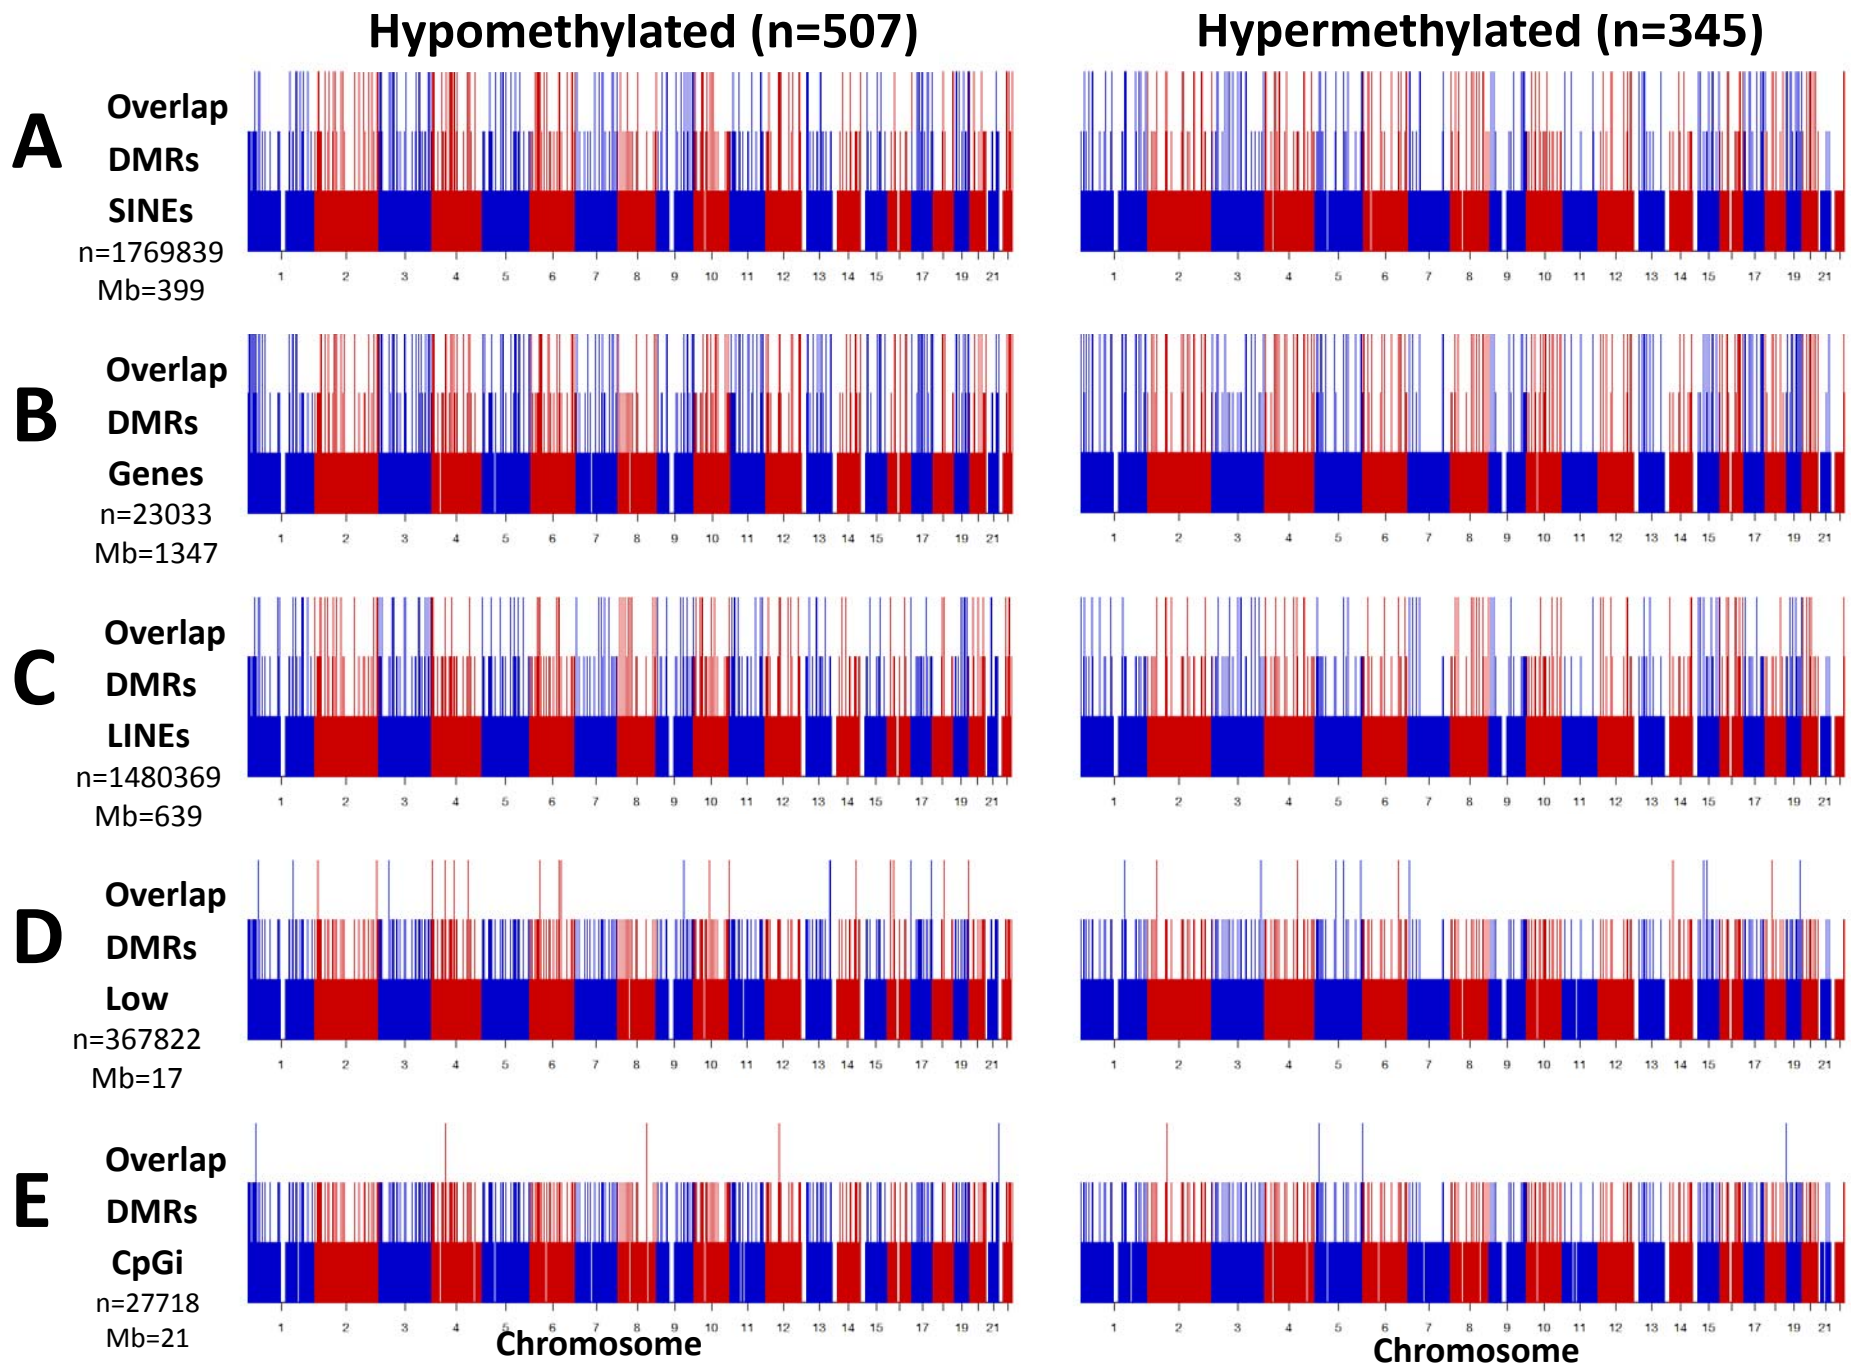

**Fig S2. Overlaps between DMRs and selected genomic features.** Colors divides chromosomes. SINE/LINE = Short/Long Interspersed Nuclear Element. Low = Low complexity DNA. CpGi = CpG islands. Mb = Coverage in megabases.

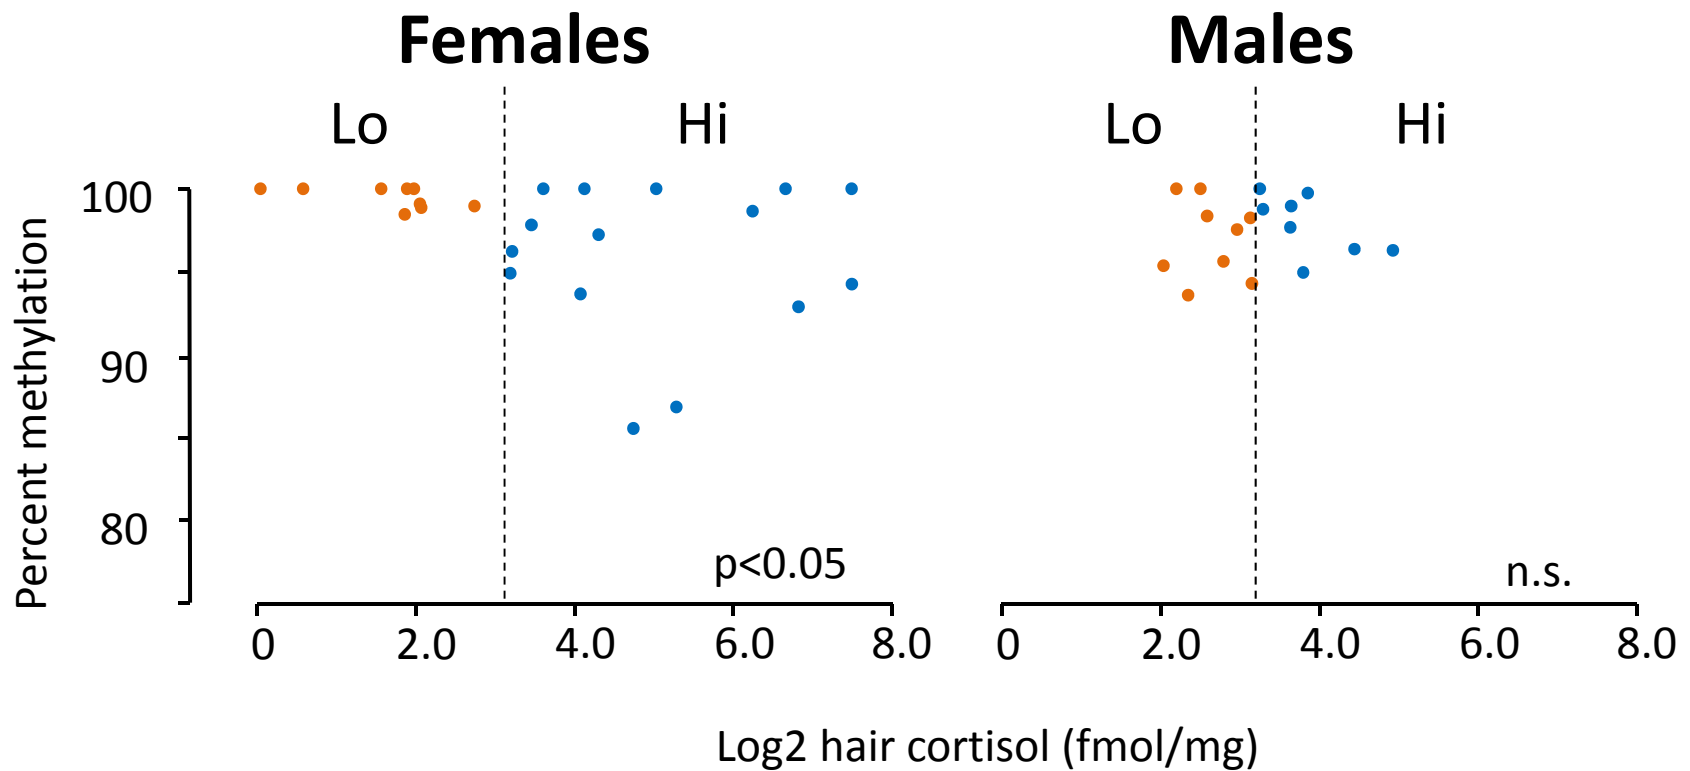

**Fig S3. Bisulfite pyrosequencing results for the *BRCA1* gene.** Blue represents high and red low hair cortisol children. P-value indicates results of a Mann-Whitney U test.

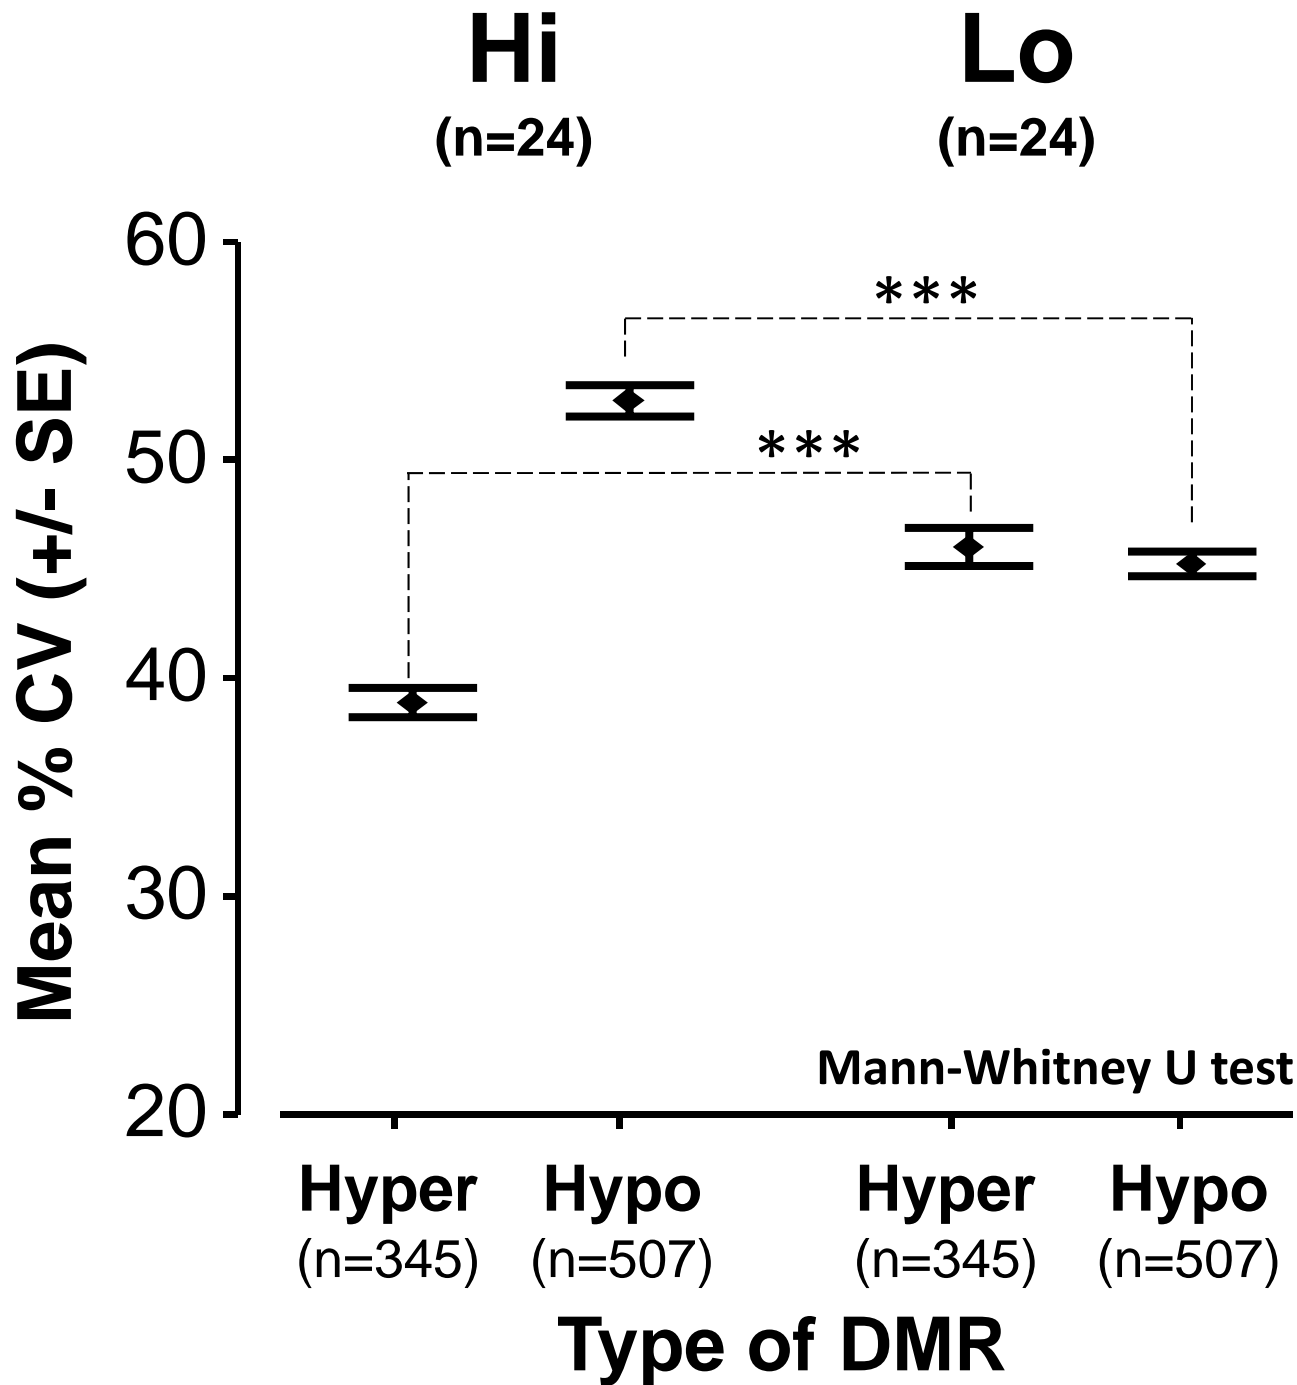

**Fig S4. Comparison of the variation in DMR methylation between Hi and Lo, as measured by the Coefficient of Variation (CV).** Hypo-methylated DMRs show more variation, while hypermethylated DMRs show less variation in Hi compared to Lo, where Lo is more stable across all DMRs. CVs were calculated by using the read counts of individual DMRs within each group (Hi/Lo), while standard errors (SE) were derived from the means of the hypo- and hypermethylated CVs respectively.

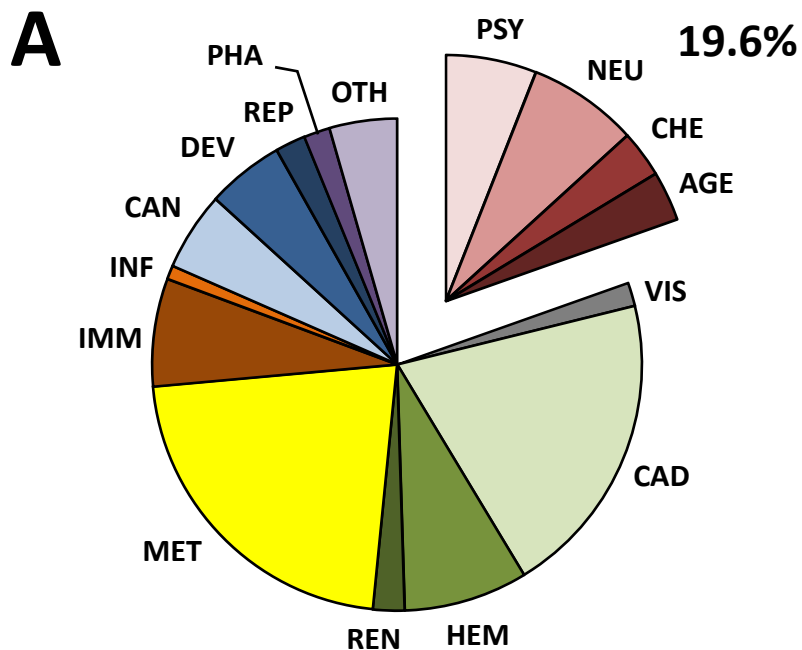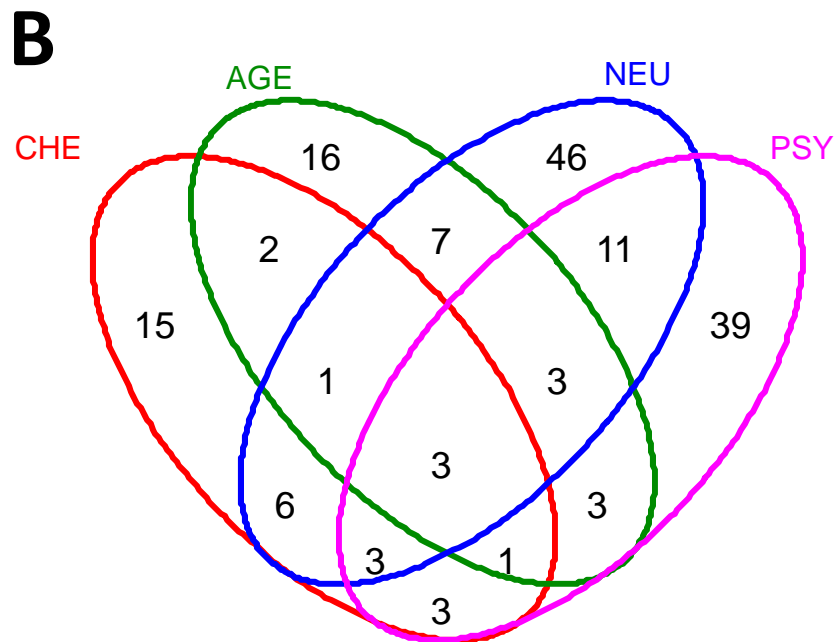

**Fig S5. Raw frequencies of disease class representation and evidence for neuropsychiatric genes within the AGE class.** (A) Circle diagram shows non-normalized proportions of disease classes within the  $p < 0.0001$  DMR associated genes. Note that MET and CAD are both heavily affected by publication bias containing more than 15 000 and 10 000 gene associations respectively, compared to REP and PHA that contains less than 600. Thus, normalizing with total number of listed genes within each class is appropriate (Fig. 4B in main article). (B) Wenn diagram showing gene overlaps between four disease classes. Note that the majority of PSY and NEU disease genes do not overlap, while most genes associated with AGE diseases overlap with PSY, NEU and CHE associated diseases/disorders. PSY=Psychology, NEU=Neurological, CHE=Chemical dependence, VIS=Vision, AGE=Aging, CAD=Cardiovascular, HEM=Hematological, REN=Renal, MET=Metabolic, IMM=Immune, INF=Infection, CAN=Cancer, DEV=Development, REP=Reproduction, PHA=Pharmacogenomic, OTH=Other.

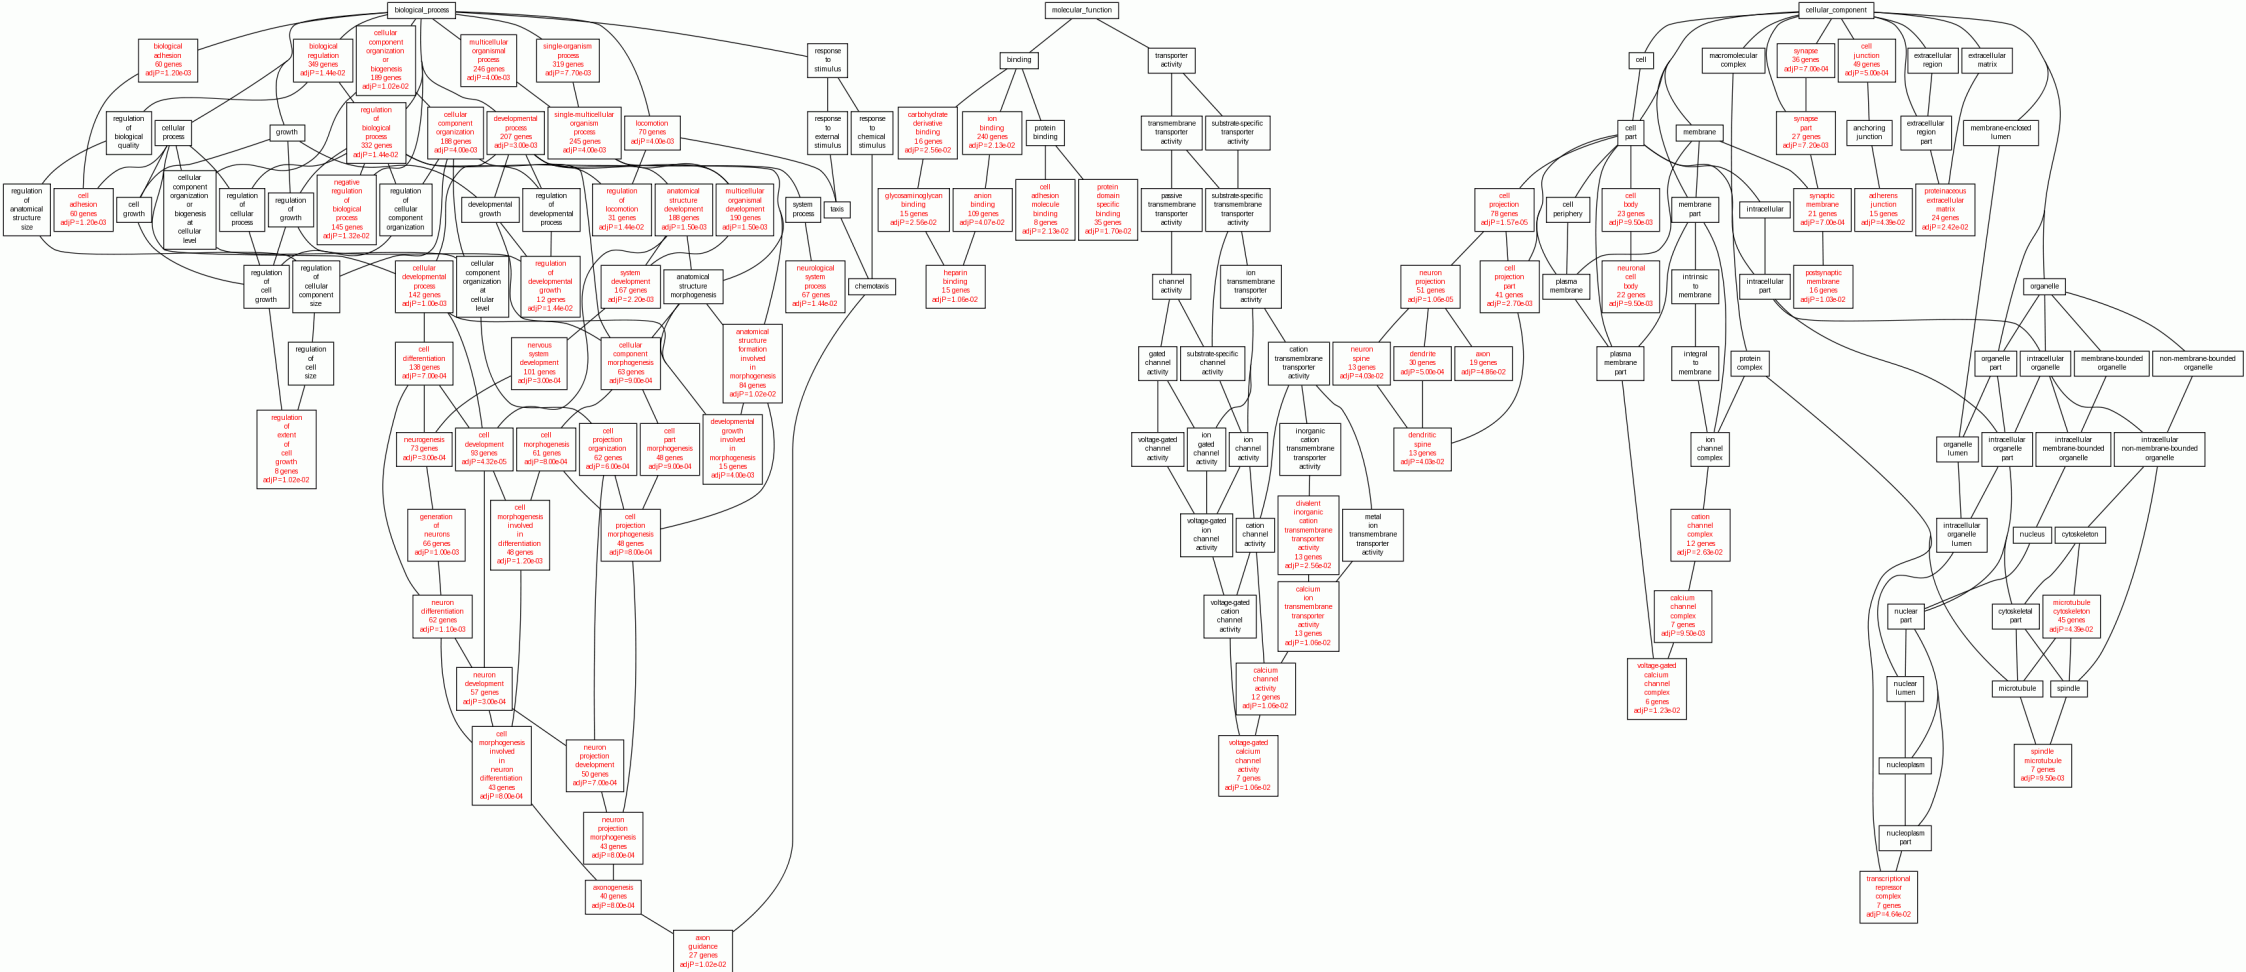

**Fig S6. Gene ontology tree** showing significant GO term enrichments within the  $p < 0.0001$  DMR associated genes. Red indicates significant enrichments ( $p < 0.05$  FDR adjusted) with at least 5 genes.



## ZNF263

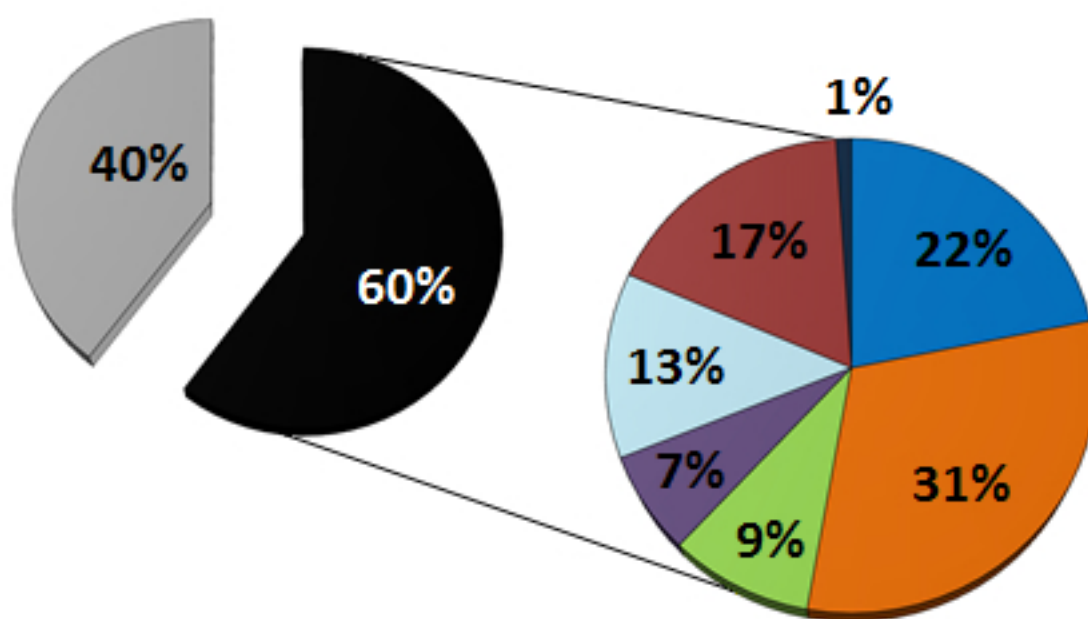

## EGR1

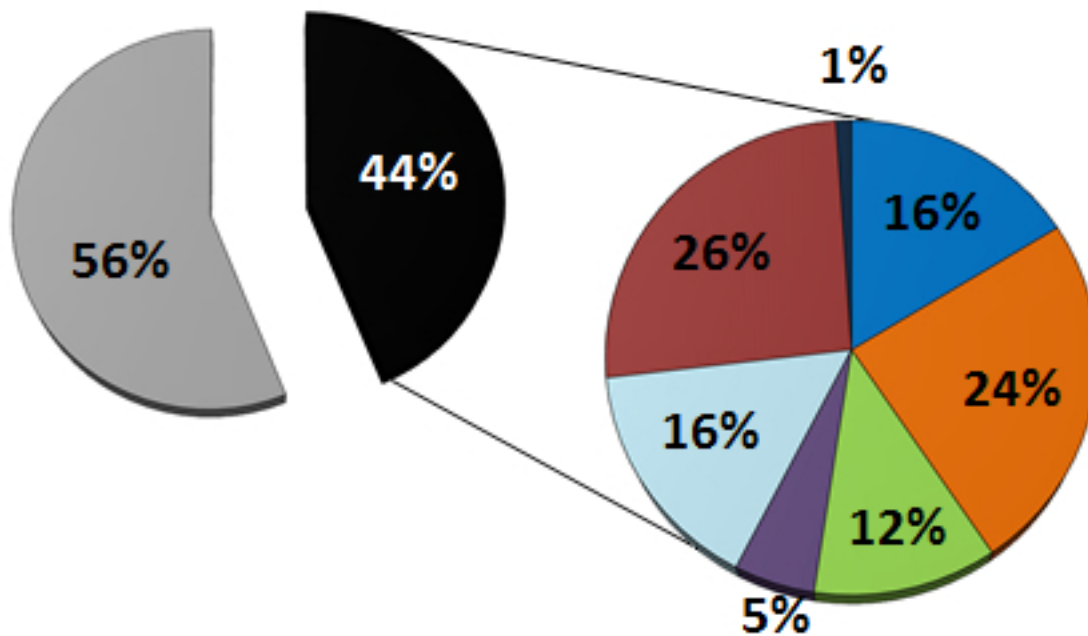

## SP1

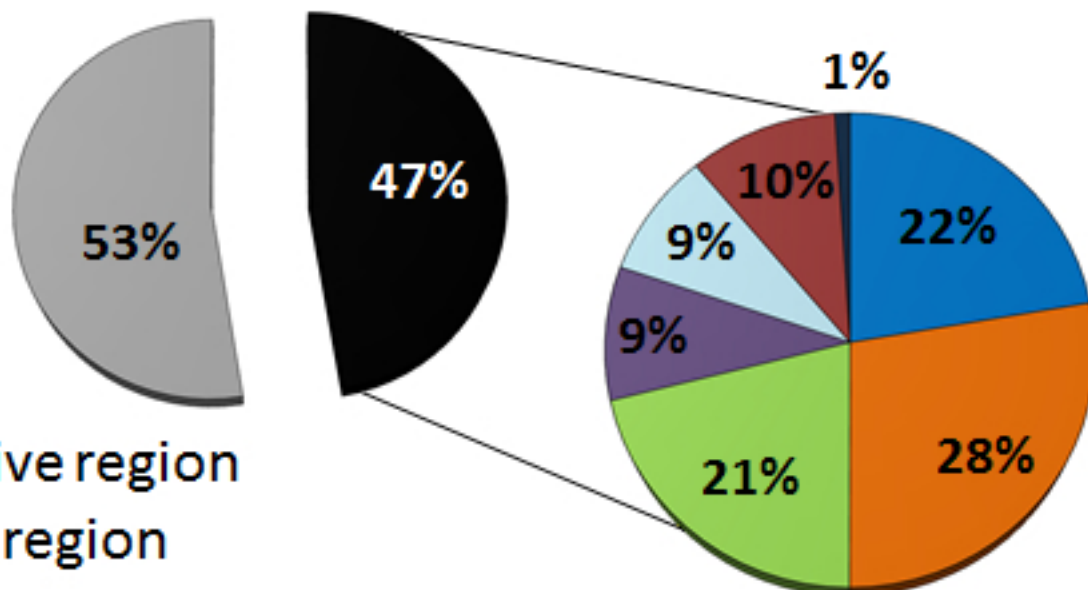

**Fig S7. Candidate Zinc finger binding to repetitive sequences.** ZNF263 tend to bind repeat regions, especially SINE's, more often than EGR1 and SP1. Circle diagrams shows percent occurrence of repeats in transcription factor (TF) binding regions for three candidate TF's (ZNF263, EGR1, SP1) that were associated with hypomethylated regions in Hi children. TF regions were adopted from previous Encode ChIP-seq experiments, while repeat data were downloaded from the repeatmasker database.

■ Repetitive region  
■ Unique region

■ LINEs  
■ SINEs  
■ LTRs  
■ DNA transposons  
■ Low complexity  
■ Simple repeats  
■ Other

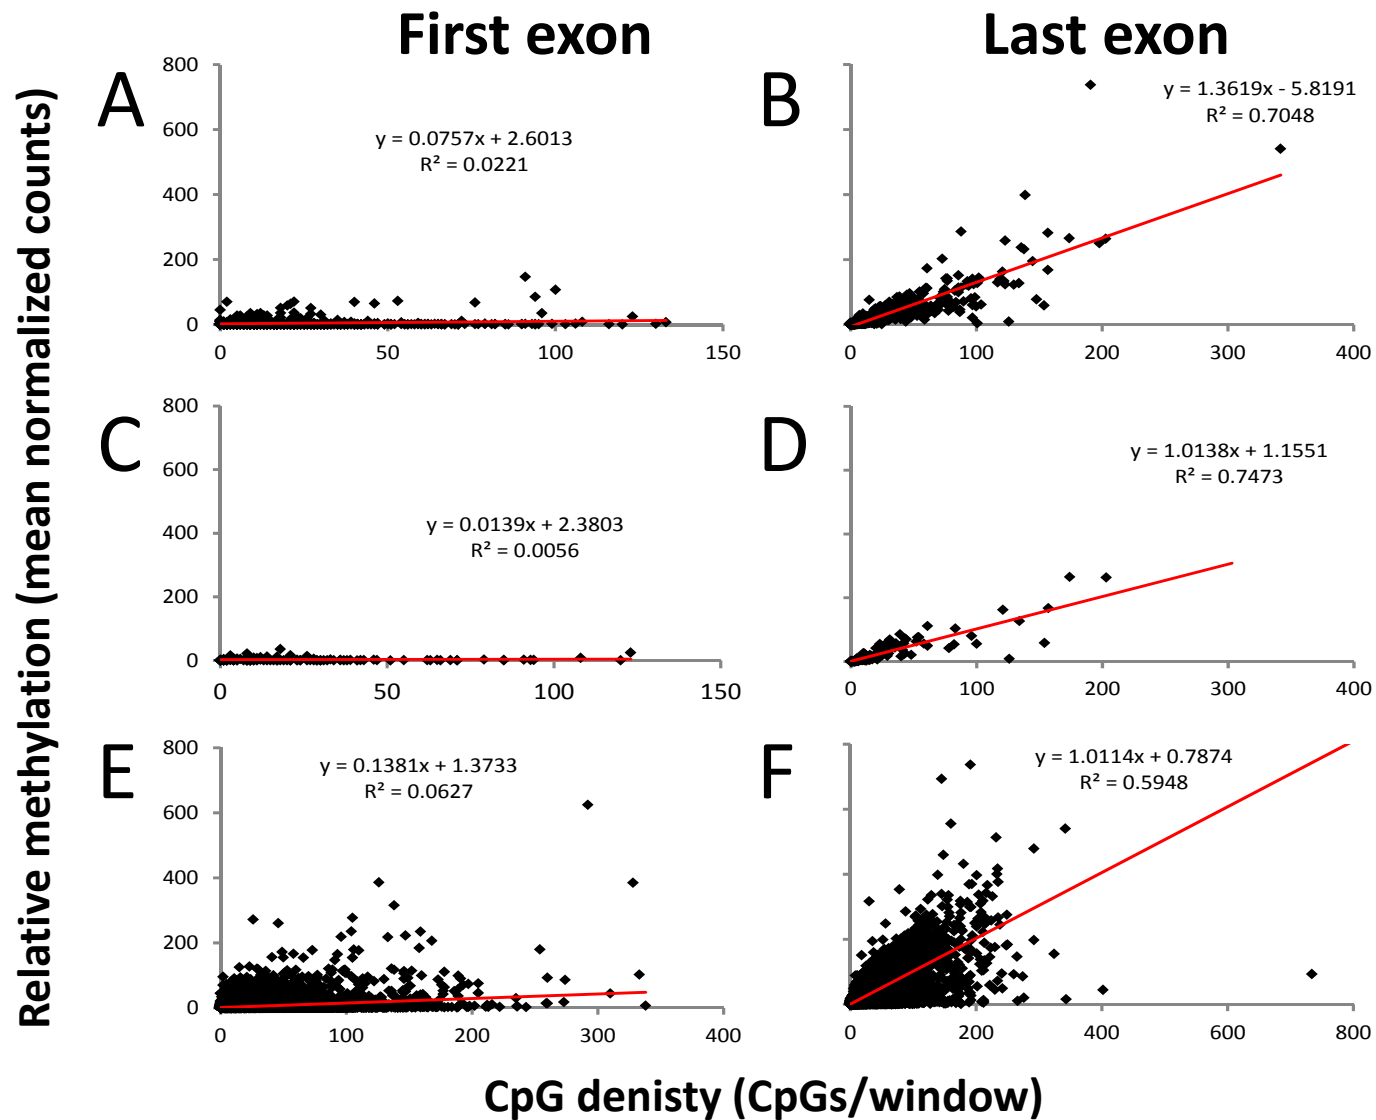

**Fig S8. First exon versus last exon methylation relative to number of CpG's.** Individual dots represent mean per individual exon across all children (n=48). **A** and **B** plots show genes closest to differentially methylated regions (DMR's,  $p < 0.0001$ ) between high and low hair cortisol children. **C** and **D** shows the subset of DMR's associated genes that previously been associated with disease. **E** and **F** shows all first and last exons, genome wide. Included are only genes with at least three exons.

## **2. Supplemental tables**

**Table S1.** Some demographic and social data of the participating children.

|                                                                                                          | Cortisol group |     | <i>p</i> -value |     |                   |
|----------------------------------------------------------------------------------------------------------|----------------|-----|-----------------|-----|-------------------|
|                                                                                                          | High           | Low |                 |     |                   |
| <b>Gender (n, %):</b>                                                                                    |                |     |                 |     |                   |
| boys                                                                                                     | 8              | 42  | 11              | 58  | 0.38              |
| girls                                                                                                    | 16             | 55  | 13              | 45  |                   |
| <b>Birth weight (kg):</b>                                                                                |                |     |                 |     |                   |
| mean                                                                                                     | 3.75           |     | 3.46            |     | 0.11 <sup>A</sup> |
| s.d                                                                                                      | 0.63           |     | 0.61            |     |                   |
| <b>Birth length (cm):</b>                                                                                |                |     |                 |     |                   |
| mean                                                                                                     | 51.1           |     | 50.6            |     | 0.43 <sup>A</sup> |
| s.d                                                                                                      | 2.2            |     | 2.5             |     |                   |
| <b>Normal vaginal delivery (n, %)<sup>B</sup>:</b>                                                       |                |     |                 |     |                   |
| yes                                                                                                      | 22             | 92  | 22              | 96  | 0.51              |
| no                                                                                                       | 2              | 8   | 1               | 4   |                   |
| <b>Mother born in Sweden (n, %):</b>                                                                     |                |     |                 |     |                   |
| yes                                                                                                      | 21             | 87  | 21              | 87  | 0.67              |
| no                                                                                                       | 3              | 13  | 3               | 13  |                   |
| <b>Father born in Sweden (n, %):</b>                                                                     |                |     |                 |     |                   |
| yes                                                                                                      | 22             | 91  | 22              | 91  | 0.7               |
| no                                                                                                       | 2              | 9   | 2               | 9   |                   |
| <b>Mother educational level (n, %):</b>                                                                  |                |     |                 |     |                   |
| low                                                                                                      | 12             | 50  | 7               | 29  | 0.24              |
| high                                                                                                     | 12             | 50  | 17              | 71  |                   |
| <b>Father educational level (n, %)<sup>B</sup>:</b>                                                      |                |     |                 |     |                   |
| low                                                                                                      | 12             | 54  | 10              | 44  | 0.46              |
| high                                                                                                     | 10             | 46  | 13              | 56  |                   |
| <b>Housing (n, %)<sup>B</sup>:</b>                                                                       |                |     |                 |     |                   |
| villa/own house                                                                                          | 16             | 70  | 19              | 83  | 0.49              |
| apartment                                                                                                | 7              | 30  | 4               | 17  |                   |
| <b>Mother smoker (n, %)<sup>B</sup><br/>(child age 3):</b>                                               |                |     |                 |     |                   |
| yes                                                                                                      | 2              | 9   | 2               | 9   | 0.7               |
| no                                                                                                       | 21             | 91  | 21              | 91  |                   |
| <b>Mother smoker (n, %)<br/>(child age 5):</b>                                                           |                |     |                 |     |                   |
| yes                                                                                                      | 3              | 12  | 1               | 4   | 0.61              |
| no                                                                                                       | 21             | 88  | 23              | 96  |                   |
| <b>Mother report experience of serious<br/>life events (n, %)<br/>(birth):</b>                           |                |     |                 |     |                   |
| yes                                                                                                      | 9              | 37  | 10              | 42  | 0.77              |
| no                                                                                                       | 15             | 63  | 14              | 58  |                   |
| <b>Mother report experience of serious<br/>life events (n, %)<sup>B</sup><br/>(child age 3):</b>         |                |     |                 |     |                   |
| yes                                                                                                      | 10             | 44  | 5               | 22  | 0.21              |
| no                                                                                                       | 13             | 56  | 18              | 78  |                   |
| <b>Mother report good social support<br/>for her and her child (n, %)<sup>B</sup><br/>(child age 5):</b> |                |     |                 |     |                   |
| yes                                                                                                      | 19             | 83  | 21              | 95  | 0.35              |
| no                                                                                                       | 4              | 17  | 1               | 5   |                   |
| <b>Mother report a safe life situation (n,<br/>%)<sup>B</sup><br/>(child age 5):</b>                     |                |     |                 |     |                   |
| yes                                                                                                      | 21             | 88  | 22              | 100 | 0.24              |
| no                                                                                                       | 3              | 12  | 0               | 0   |                   |

All p-values  $\chi^2$ , except <sup>A</sup> = Anova<sup>B</sup> At least one non-responders/drop-outs on the question

**Table S2. Summary of the main bioinformatics tools used.**

| <i>Tool</i>                 | <i>Purpose</i>                                   | <i>Version</i>     | <i>Special settings</i> <sup>A</sup> |
|-----------------------------|--------------------------------------------------|--------------------|--------------------------------------|
| <i>Sequencing alignment</i> |                                                  |                    |                                      |
| CASAVA                      | Demultiplex, Conversion                          | 1.8.2              |                                      |
| BWA                         | Alignment to hg19                                | 0.6.2              |                                      |
| Picard                      | Sorting, Removal PCR-duplicates                  | 1.69               |                                      |
| <i>Genetic association</i>  |                                                  |                    |                                      |
| GATK                        | SNP-calling                                      | 3.3                |                                      |
| EPACTS                      | Genetic association                              | 3.2.6              |                                      |
| <i>Methylation analysis</i> |                                                  |                    |                                      |
| MEDIPS                      | Quality check                                    | 1.16.0             |                                      |
| GenomicRanges               | Tiling genomic windows                           | 1.18.4             | 300 bp                               |
| EDASeq                      | Normalization                                    | 2.0.0              | Full quantile                        |
| edgeR                       | DMR analysis                                     | 3.8.5              | BH, tagwise disp                     |
| <i>Functional analysis</i>  |                                                  |                    |                                      |
| WebGestalt                  | Gene ontology, Pathway analysis                  | 5/20/2014          |                                      |
| GenometriCorr               | Associations in genomic space                    | 1.1.10             | 10 000 permutations                  |
| <i>Sequence analysis</i>    |                                                  |                    |                                      |
| MEME                        | Consensus motif analysis                         | 4.9.1 <sup>B</sup> |                                      |
| TOMTOM                      | Consensus motif to transcription factor motif    | 4.9.1 <sup>B</sup> | See Materials and Methods            |
| FIMO                        | Consensus motif enrichment in DMR's (+/- 300 bp) | 4.9.1 <sup>B</sup> |                                      |

<sup>A</sup> If not stated otherwise, default settings were used.

<sup>B</sup> Tools are parts of the MEME Suite and share the same version number.

**Table S3. Differentially methylated regions in the whole genome analysis**

| <i>Closest gene</i> | <i>log2 FC</i> | <i>PValue</i> | <i>FDR</i> | <i>Genomic location (bp)</i> |              |            |
|---------------------|----------------|---------------|------------|------------------------------|--------------|------------|
|                     |                |               |            | <i>chromosome</i>            | <i>start</i> | <i>end</i> |
| <i>PRDM14</i>       | -1.37          | 0.000000002   | 0.0059     | 8                            | 70976101     | 70976400   |
| <i>PPP6R2</i>       | 0.48           | 0.000000041   | 0.0332     | 22                           | 50870401     | 50870700   |
| <i>NEK4</i>         | -0.73          | 0.000000056   | 0.0332     | 3                            | 52758001     | 52758300   |
| <i>USP28</i>        | 0.58           | 0.000000056   | 0.0332     | 11                           | 113710501    | 113710800  |
| <i>POFUT2</i>       | -0.63          | 0.000000061   | 0.0332     | 21                           | 46696501     | 46696800   |
| <i>CACNA1S</i>      | -0.78          | 0.000000083   | 0.0332     | 1                            | 201006301    | 201006600  |
| <i>ABLIM2</i>       | -0.64          | 0.000000087   | 0.0332     | 4                            | 8095801      | 8096100    |
| <i>GABBR2</i>       | -0.87          | 0.000000089   | 0.0332     | 9                            | 101221201    | 101221500  |
| <i>NBPF3</i>        | -1.18          | 0.000000112   | 0.0374     | 1                            | 21752401     | 21752700   |
| <i>FAM153B</i>      | -0.90          | 0.000000163   | 0.0488     | 5                            | 175528501    | 175528800  |
| <i>FAM49A</i>       | -1.02          | 0.000000272   | 0.0742     | 2                            | 16419901     | 16420200   |
| <i>KCNT2</i>        | -1.15          | 0.000000388   | 0.0809     | 1                            | 195754201    | 195754500  |
| <i>FMO9P</i>        | -1.35          | 0.000000400   | 0.0809     | 1                            | 166579801    | 166580100  |
| <i>LOC101448202</i> | -0.69          | 0.000000405   | 0.0809     | 9                            | 137713501    | 137713800  |
| <i>TP53BP2</i>      | -1.07          | 0.000000441   | 0.0809     | 1                            | 224145001    | 224145300  |
| <i>THBS2</i>        | -1.30          | 0.000000458   | 0.0809     | 6                            | 169665001    | 169665300  |
| <i>AEBP2</i>        | 0.67           | 0.000000459   | 0.0809     | 12                           | 19655701     | 19656000   |
| <i>TULP1</i>        | -0.55          | 0.000000514   | 0.0856     | 6                            | 35468701     | 35469000   |
| <i>CETN1</i>        | 0.80           | 0.000000679   | 0.1035     | 18                           | 584101       | 584400     |
| <i>PDE10A</i>       | -0.46          | 0.000000729   | 0.1035     | 6                            | 166100701    | 166101000  |
| <i>AGAP1</i>        | -0.40          | 0.000000759   | 0.1035     | 2                            | 236645101    | 236645400  |
| <i>LINC00595</i>    | -0.89          | 0.000000817   | 0.1035     | 10                           | 80097901     | 80098200   |
| <i>NUP153</i>       | 0.84           | 0.000000825   | 0.1035     | 6                            | 17620201     | 17620500   |
| <i>UXS1</i>         | -0.96          | 0.000000828   | 0.1035     | 2                            | 106830601    | 106830900  |
| <i>CDH6</i>         | 1.03           | 0.000001068   | 0.1222     | 5                            | 31088701     | 31089000   |
| <i>LRRN1</i>        | 1.36           | 0.000001075   | 0.1222     | 3                            | 3779701      | 3780000    |
| <i>CACNA1I</i>      | -0.82          | 0.000001171   | 0.1222     | 22                           | 40052101     | 40052400   |
| <i>MIAT</i>         | -0.81          | 0.000001215   | 0.1222     | 22                           | 27150601     | 27150900   |
| <i>CCDC30</i>       | 1.10           | 0.000001216   | 0.1222     | 1                            | 42985801     | 42986100   |
| <i>RRAGC</i>        | -1.08          | 0.000001241   | 0.1222     | 1                            | 39186601     | 39186900   |
| <i>PHAX</i>         | 1.21           | 0.000001263   | 0.1222     | 5                            | 125949901    | 125950200  |
| <i>STRN</i>         | 0.85           | 0.000001340   | 0.1257     | 2                            | 37155301     | 37155600   |
| <i>TSNARE1</i>      | -0.81          | 0.000001439   | 0.1308     | 8                            | 143377501    | 143377800  |
| <i>SLC45A2</i>      | -0.98          | 0.000001591   | 0.1333     | 5                            | 33981001     | 33981300   |
| <i>STEAP4</i>       | -1.09          | 0.000001666   | 0.1333     | 7                            | 87940201     | 87940500   |
| <i>KRTAP3-2</i>     | -0.89          | 0.000001750   | 0.1333     | 17                           | 39156001     | 39156300   |
| <i>IDE</i>          | 0.50           | 0.000001755   | 0.1333     | 10                           | 94203001     | 94203300   |
| <i>NAT1</i>         | -1.14          | 0.000001831   | 0.1333     | 8                            | 18141001     | 18141300   |
| <i>EMP2</i>         | 0.73           | 0.000001843   | 0.1333     | 16                           | 10610401     | 10610700   |
| <i>PCM1</i>         | 0.96           | 0.000001860   | 0.1333     | 8                            | 17805901     | 17806200   |
| <i>PRRG4</i>        | -1.11          | 0.000001863   | 0.1333     | 11                           | 32893501     | 32893800   |
| <i>MCF2L-AS1</i>    | -0.56          | 0.000001959   | 0.1333     | 13                           | 113618401    | 113618700  |
| <i>SLC12A8</i>      | -0.91          | 0.000001991   | 0.1333     | 3                            | 124907401    | 124907700  |
| <i>ATP11C</i>       | -1.18          | 0.000001995   | 0.1333     | X                            | 138954601    | 138954900  |
| <i>PER3</i>         | -0.85          | 0.000002011   | 0.1333     | 1                            | 7887901      | 7888200    |
| <i>CTNND2</i>       | 1.15           | 0.000002046   | 0.1333     | 5                            | 10884301     | 10884600   |
| <i>IMMP2L</i>       | -1.05          | 0.000002089   | 0.1333     | 7                            | 110298601    | 110298900  |
| <i>RALGAPA2</i>     | -0.75          | 0.000002147   | 0.1342     | 20                           | 20388001     | 20388300   |
| <i>USP17L11</i>     | -0.60          | 0.000002221   | 0.1360     | 4                            | 9250501      | 9250800    |
| <i>CKAP2L</i>       | -1.02          | 0.000002293   | 0.1376     | 2                            | 113498401    | 113498700  |
| <i>CHMP2A</i>       | 0.68           | 0.000002351   | 0.1383     | 19                           | 59063101     | 59063400   |
| <i>ALOX5AP</i>      | 0.88           | 0.000002486   | 0.1434     | 13                           | 31322101     | 31322400   |
| <i>CNTN5</i>        | -0.95          | 0.000002547   | 0.1442     | 11                           | 99544201     | 99544500   |
| <i>PSMD7</i>        | 0.74           | 0.000002838   | 0.1577     | 16                           | 74312401     | 74312700   |
| <i>TADA2B</i>       | -0.89          | 0.000002902   | 0.1583     | 4                            | 7046701      | 7047000    |
| <i>SNORD114-31</i>  | 1.09           | 0.000003040   | 0.1616     | 14                           | 101470801    | 101471100  |
| <i>KLHL1</i>        | -0.95          | 0.000003081   | 0.1616     | 13                           | 70675801     | 70676100   |
| <i>LINC00939</i>    | -0.50          | 0.000003210   | 0.1616     | 12                           | 126466801    | 126467100  |
| <i>CDK1</i>         | 0.96           | 0.000003256   | 0.1616     | 10                           | 62558401     | 62558700   |
| <i>UACA</i>         | 1.03           | 0.000003385   | 0.1616     | 15                           | 71057101     | 71057400   |
| <i>NR2C1</i>        | 0.71           | 0.000003472   | 0.1616     | 12                           | 95431201     | 95431500   |
| <i>OPN4</i>         | -1.07          | 0.000003516   | 0.1616     | 10                           | 88419901     | 88420200   |
| <i>BPIFB1</i>       | 0.79           | 0.000003582   | 0.1616     | 20                           | 31902301     | 31902600   |
| <i>AGAP9</i>        | -1.13          | 0.000003585   | 0.1616     | 10                           | 47192401     | 47192700   |
| <i>KATNB1</i>       | 0.40           | 0.000003643   | 0.1616     | 16                           | 57767701     | 57768000   |
| <i>SEC63</i>        | 0.99           | 0.000003724   | 0.1616     | 6                            | 108189001    | 108189300  |

|                |       |             |        |    |           |           |
|----------------|-------|-------------|--------|----|-----------|-----------|
| PBX4           | -0.39 | 0.000003738 | 0.1616 | 19 | 19699801  | 19700100  |
| KCNMB2         | 0.98  | 0.000003906 | 0.1616 | 3  | 178596301 | 178596600 |
| FLJ33360       | -1.25 | 0.000003920 | 0.1616 | 5  | 6219301   | 6219600   |
| TPD52          | 1.16  | 0.000003925 | 0.1616 | 8  | 80982601  | 80982900  |
| MIR4278        | 0.80  | 0.000003993 | 0.1616 | 5  | 6899401   | 6899700   |
| HS3ST4         | -1.09 | 0.000003995 | 0.1616 | 16 | 26148901  | 26149200  |
| FAM49A         | -0.92 | 0.000004018 | 0.1616 | 2  | 16419601  | 16419900  |
| CLCN4          | -0.59 | 0.000004090 | 0.1616 | X  | 10174501  | 10174800  |
| LINC00948      | -1.06 | 0.000004112 | 0.1616 | 10 | 61507201  | 61507500  |
| VTCN1          | -0.89 | 0.000004144 | 0.1616 | 1  | 117783901 | 117784200 |
| ERRF1          | 0.82  | 0.000004205 | 0.1616 | 1  | 8141701   | 8142000   |
| RPRD1B         | 0.77  | 0.000004246 | 0.1616 | 20 | 36717001  | 36717300  |
| C10orf35       | 0.93  | 0.000004287 | 0.1616 | 10 | 71445001  | 71445300  |
| SOD2           | -0.64 | 0.000004321 | 0.1616 | 6  | 160032301 | 160032600 |
| GPC5           | -0.86 | 0.000004364 | 0.1616 | 13 | 92934301  | 92934600  |
| LMO7           | -0.80 | 0.000004577 | 0.1652 | 13 | 76262101  | 76262400  |
| TMEM18         | -0.79 | 0.000004713 | 0.1652 | 2  | 611401    | 611700    |
| LINC00838      | 1.09  | 0.000004727 | 0.1652 | 10 | 33960901  | 33961200  |
| CTNNA1         | -0.86 | 0.000004790 | 0.1652 | 5  | 138270601 | 138270900 |
| ZNF420         | 0.87  | 0.000004809 | 0.1652 | 19 | 37530601  | 37530900  |
| TPBG           | 0.95  | 0.000004870 | 0.1652 | 6  | 83169601  | 83169900  |
| CDK1           | 1.04  | 0.000004905 | 0.1652 | 10 | 62558701  | 62559000  |
| BRCA1          | -0.81 | 0.000004950 | 0.1652 | 17 | 41241601  | 41241900  |
| APBB2          | 0.78  | 0.000004956 | 0.1652 | 4  | 41043901  | 41044200  |
| KRT18P55       | -0.54 | 0.000005189 | 0.1702 | 17 | 26631001  | 26631300  |
| ATG7           | -1.05 | 0.000005345 | 0.1702 | 3  | 11546401  | 11546700  |
| FAM78A         | -0.88 | 0.000005357 | 0.1702 | 9  | 134146501 | 134146800 |
| KLF5           | 0.79  | 0.000005410 | 0.1702 | 13 | 73949701  | 73950000  |
| USP17L25       | -0.67 | 0.000005424 | 0.1702 | 4  | 9327901   | 9328200   |
| KCNF1          | -0.95 | 0.000005550 | 0.1702 | 2  | 11064001  | 11064300  |
| LINC00276      | -0.76 | 0.000005555 | 0.1702 | 2  | 14517901  | 14518200  |
| SERP1          | 0.92  | 0.000005573 | 0.1702 | 3  | 150244201 | 150244500 |
| RP11-770E5.1   | -1.05 | 0.000005623 | 0.1702 | 8  | 49251301  | 49251600  |
| GPR68          | -0.89 | 0.000005717 | 0.1702 | 14 | 91706701  | 91707000  |
| MIR2054        | 1.16  | 0.000005777 | 0.1702 | 4  | 126646801 | 126647100 |
| SPATA31C1      | -0.71 | 0.000005809 | 0.1702 | 9  | 90558901  | 90559200  |
| DKFZp566F0947  | -0.85 | 0.000005865 | 0.1702 | 19 | 31465201  | 31465500  |
| LOC729159      | 0.82  | 0.000005943 | 0.1702 | 16 | 60557701  | 60558000  |
| LOC101929034   | -0.78 | 0.000005963 | 0.1702 | 5  | 1843501   | 1843800   |
| LOC595101      | 0.69  | 0.000006015 | 0.1702 | 16 | 30353401  | 30353700  |
| ZNF664-FAM101A | -0.88 | 0.000006210 | 0.1709 | 12 | 124617601 | 124617900 |
| IGFBP2         | 1.45  | 0.000006220 | 0.1709 | 2  | 217442701 | 217443000 |
| KLHL29         | -0.87 | 0.000006252 | 0.1709 | 2  | 23171401  | 23171700  |
| SUMO1          | 1.03  | 0.000006266 | 0.1709 | 2  | 203079901 | 203080200 |
| P2RY12         | -0.65 | 0.000006326 | 0.1710 | 3  | 151092301 | 151092600 |
| APBBP2         | -0.93 | 0.000006403 | 0.1715 | 17 | 58586401  | 58586700  |
| ATF7IP2        | 1.03  | 0.000006515 | 0.1723 | 16 | 10445401  | 10445700  |
| LOC344967      | -0.74 | 0.000006547 | 0.1723 | 4  | 40043701  | 40044000  |
| RBM33          | -1.05 | 0.000006767 | 0.1754 | 7  | 155549101 | 155549400 |
| SH2D3A         | -1.00 | 0.000006781 | 0.1754 | 19 | 6759601   | 6759900   |
| LINC00210      | 0.50  | 0.000006937 | 0.1779 | 1  | 218068201 | 218068500 |
| SEMA4D         | 0.75  | 0.000007019 | 0.1784 | 9  | 91988401  | 91988700  |
| FBN2           | -1.03 | 0.000007128 | 0.1797 | 5  | 127683001 | 127683300 |
| ERG            | -0.57 | 0.000007220 | 0.1805 | 21 | 40068001  | 40068300  |
| HAS2           | 0.76  | 0.000007381 | 0.1819 | 8  | 122345701 | 122346000 |
| ACN9           | -1.16 | 0.000007398 | 0.1819 | 7  | 96839401  | 96839700  |
| ELOVL6         | 1.20  | 0.000007494 | 0.1828 | 4  | 111247501 | 111247800 |
| EXOG           | -0.72 | 0.000007628 | 0.1845 | 3  | 38547001  | 38547300  |
| SERINC5        | -0.74 | 0.000007839 | 0.1866 | 5  | 79443901  | 79444200  |
| TPSD1          | 0.72  | 0.000007899 | 0.1866 | 16 | 1300501   | 1300800   |
| COL5A3         | -0.75 | 0.000007900 | 0.1866 | 19 | 10107901  | 10108200  |
| GNB2L1         | -0.98 | 0.000007976 | 0.1869 | 5  | 180665101 | 180665400 |
| THSD4          | -0.72 | 0.000008116 | 0.1888 | 15 | 72042901  | 72043200  |
| RAB11FIP4      | -0.72 | 0.000008238 | 0.1899 | 17 | 29741701  | 29742000  |
| TGFA           | 0.70  | 0.000008316 | 0.1899 | 2  | 70665301  | 70665600  |
| CACNB2         | 0.57  | 0.000008357 | 0.1899 | 10 | 18738301  | 18738600  |
| FAM220A        | 0.47  | 0.000008544 | 0.1910 | 7  | 6346501   | 6346800   |
| MESP1          | 0.72  | 0.000008570 | 0.1910 | 15 | 90298201  | 90298500  |
| GPM6A          | 0.99  | 0.000008647 | 0.1910 | 4  | 176692501 | 176692800 |
| TRIM61         | 0.62  | 0.000008668 | 0.1910 | 4  | 165914101 | 165914400 |

|              |       |             |        |    |           |           |
|--------------|-------|-------------|--------|----|-----------|-----------|
| LOC389033    | 0.65  | 0.000008787 | 0.1910 | 2  | 130184701 | 130185000 |
| FOXP1        | -0.89 | 0.000008837 | 0.1910 | 3  | 70982701  | 70983000  |
| PICK1        | -0.98 | 0.000008848 | 0.1910 | 22 | 38464201  | 38464500  |
| ST5          | 0.75  | 0.000009052 | 0.1940 | 11 | 8833201   | 8833500   |
| MIR205HG     | -0.89 | 0.000009188 | 0.1946 | 1  | 209261401 | 209261700 |
| SEMA5A       | -1.08 | 0.000009210 | 0.1946 | 5  | 9108301   | 9108600   |
| SYTL4        | -1.08 | 0.000009460 | 0.1985 | X  | 99982801  | 99983100  |
| BMS1         | -0.54 | 0.000009666 | 0.2014 | 10 | 43368601  | 43368900  |
| STAM2        | -0.96 | 0.000009739 | 0.2015 | 2  | 153029701 | 153030000 |
| TPGS1        | 0.90  | 0.000010166 | 0.2077 | 19 | 519601    | 519900    |
| MMP24        | 0.40  | 0.000010177 | 0.2077 | 20 | 33856501  | 33856800  |
| LOC101929681 | -0.90 | 0.000010349 | 0.2089 | 5  | 29980201  | 29980500  |
| PRDM6        | -1.02 | 0.000010383 | 0.2089 | 5  | 122446801 | 122447100 |
| RP4-723E3.1  | -1.08 | 0.000010452 | 0.2089 | 20 | 51290701  | 51291000  |
| IDUA         | -0.88 | 0.000010515 | 0.2089 | 4  | 1001401   | 1001700   |
| MIR548N      | 0.64  | 0.000010597 | 0.2091 | 2  | 179381701 | 179382000 |
| TLE4         | 0.80  | 0.000010868 | 0.2124 | 9  | 82159501  | 82159800  |
| RGS14        | -0.87 | 0.000010902 | 0.2124 | 5  | 176795401 | 176795700 |
| LOC650293    | -1.17 | 0.000011014 | 0.2132 | 4  | 9054601   | 9054900   |
| CPN1         | 0.90  | 0.000011209 | 0.2156 | 10 | 101790301 | 101790600 |
| LEF1-AS1     | 0.54  | 0.000011411 | 0.2169 | 4  | 109107001 | 109107300 |
| ATP8A1       | 0.92  | 0.000011425 | 0.2169 | 4  | 42539101  | 42539400  |
| ACSL3        | -0.83 | 0.000011645 | 0.2175 | 2  | 223801201 | 223801500 |
| MEIS2        | -0.92 | 0.000011803 | 0.2175 | 15 | 37761301  | 37761600  |
| PSPC1        | 0.85  | 0.000011898 | 0.2175 | 13 | 20318701  | 20319000  |
| HPD          | 0.50  | 0.000011969 | 0.2175 | 12 | 122288101 | 122288400 |
| RHCE         | -0.83 | 0.000011999 | 0.2175 | 1  | 25751701  | 25752000  |
| RP11-71G7.1  | -1.13 | 0.000012021 | 0.2175 | 3  | 176540701 | 176541000 |
| LOC100133331 | 0.63  | 0.000012185 | 0.2175 | 1  | 332401    | 332700    |
| C9orf92      | -1.22 | 0.000012245 | 0.2175 | 9  | 16133401  | 16133700  |
| SLC24A2      | -0.84 | 0.000012307 | 0.2175 | 9  | 19958401  | 19958700  |
| SCN8A        | -0.55 | 0.000012309 | 0.2175 | 12 | 52187401  | 52187700  |
| EXOC3L2      | -0.83 | 0.000012397 | 0.2175 | 19 | 45744901  | 45745200  |
| DMBT1        | -0.96 | 0.000012410 | 0.2175 | 10 | 124305901 | 124306200 |
| CPA4         | 0.35  | 0.000012501 | 0.2175 | 7  | 129932101 | 129932400 |
| LINC00929    | -0.57 | 0.000012550 | 0.2175 | 15 | 26363701  | 26364000  |
| FAM21C       | 0.90  | 0.000012630 | 0.2175 | 10 | 46281601  | 46281900  |
| LINC00970    | -0.97 | 0.000012655 | 0.2175 | 1  | 168986101 | 168986400 |
| GUSBP1       | 0.82  | 0.000012687 | 0.2175 | 5  | 21462601  | 21462900  |
| MIR4634      | 0.60  | 0.000012947 | 0.2204 | 5  | 174169501 | 174169800 |
| FHAD1        | -1.05 | 0.000013006 | 0.2204 | 1  | 15575401  | 15575700  |
| TMEM41B      | -0.59 | 0.000013160 | 0.2209 | 11 | 9343801   | 9344100   |
| MED12L       | -1.18 | 0.000013232 | 0.2209 | 3  | 151137901 | 151138200 |
| IFFO2        | 0.87  | 0.000013252 | 0.2209 | 1  | 19288501  | 19288800  |
| LOC100132831 | 0.58  | 0.000013447 | 0.2222 | X  | 40685401  | 40685700  |
| TRAFD1       | 0.69  | 0.000013477 | 0.2222 | 12 | 112580701 | 112581000 |
| NGF          | -1.55 | 0.000013719 | 0.2249 | 1  | 116001901 | 116002200 |
| EMB          | -0.99 | 0.000013822 | 0.2254 | 5  | 49800301  | 49800600  |
| DCUN1D4      | -1.03 | 0.000014009 | 0.2264 | 4  | 52710301  | 52710600  |
| SIN3A        | 0.63  | 0.000014059 | 0.2264 | 15 | 75724801  | 75725100  |
| FAM189A1     | -0.59 | 0.000014201 | 0.2264 | 15 | 29668801  | 29669100  |
| USP17L30     | -0.44 | 0.000014257 | 0.2264 | 4  | 9353101   | 9353400   |
| SHOX         | -0.72 | 0.000014262 | 0.2264 | X  | 643801    | 644100    |
| LYRM4        | -0.91 | 0.000014362 | 0.2268 | 6  | 5244901   | 5245200   |
| TBC1D3H      | -0.84 | 0.000014594 | 0.2289 | 17 | 34757401  | 34757700  |
| SLCO3A1      | -0.84 | 0.000014666 | 0.2289 | 15 | 92678701  | 92679000  |
| DIAPH3       | -0.82 | 0.000014834 | 0.2289 | 13 | 59435701  | 59436000  |
| LDLRAD3      | -0.75 | 0.000014887 | 0.2289 | 11 | 36147601  | 36147900  |
| USP17L25     | -0.42 | 0.000014941 | 0.2289 | 4  | 9342601   | 9342900   |
| MIR138-1     | -0.90 | 0.000014958 | 0.2289 | 3  | 44203501  | 44203800  |
| SHANK2       | -0.66 | 0.000015029 | 0.2289 | 11 | 70547101  | 70547400  |
| AP1S3        | -0.88 | 0.000015296 | 0.2317 | 2  | 224630701 | 224631000 |
| LUCAT1       | -0.81 | 0.000015486 | 0.2320 | 5  | 90534601  | 90534900  |
| LIPH         | -0.71 | 0.000015512 | 0.2320 | 3  | 185230501 | 185230800 |
| LARP1        | 1.05  | 0.000015623 | 0.2320 | 5  | 154068001 | 154068300 |
| CELF4        | -0.91 | 0.000015666 | 0.2320 | 18 | 34923301  | 34923600  |
| MYOZ2        | -0.74 | 0.000015866 | 0.2320 | 4  | 120094501 | 120094800 |
| SETBP1       | 1.15  | 0.000015868 | 0.2320 | 18 | 42414001  | 42414300  |
| RIMS1        | -0.79 | 0.000015872 | 0.2320 | 6  | 72700501  | 72700800  |
| TBL1XR1      | -0.96 | 0.000015990 | 0.2320 | 3  | 176895301 | 176895600 |



|               |       |             |        |    |           |           |
|---------------|-------|-------------|--------|----|-----------|-----------|
| GAREM         | 0.78  | 0.000016010 | 0.2320 | 18 | 29897101  | 29897400  |
| SKA3          | -0.66 | 0.000016273 | 0.2341 | 13 | 21744301  | 21744600  |
| PP2D1         | 0.65  | 0.000016322 | 0.2341 | 3  | 20040601  | 20040900  |
| PRNP          | 0.42  | 0.000016436 | 0.2341 | 20 | 4569601   | 4569900   |
| REG3G         | -1.04 | 0.000016467 | 0.2341 | 2  | 79252801  | 79253100  |
| CRBN          | -0.87 | 0.000016695 | 0.2363 | 3  | 3326701   | 3327000   |
| CACHD1        | -1.29 | 0.000016917 | 0.2375 | 1  | 65033401  | 65033700  |
| NPLOC4        | -0.70 | 0.000016955 | 0.2375 | 17 | 79524901  | 79525200  |
| ANKRD20A9P    | -0.63 | 0.000017024 | 0.2375 | 13 | 19456501  | 19456800  |
| OCIAD2        | 0.96  | 0.000017153 | 0.2380 | 4  | 48915001  | 48915300  |
| FLNB          | -0.94 | 0.000017244 | 0.2380 | 3  | 58113901  | 58114200  |
| PANX2         | 0.46  | 0.000017291 | 0.2380 | 22 | 50612701  | 50613000  |
| NAAA          | -0.92 | 0.000017439 | 0.2389 | 4  | 76865701  | 76866000  |
| MKI67         | -0.59 | 0.000017627 | 0.2396 | 10 | 130079401 | 130079700 |
| SHCBP1L       | -0.54 | 0.000017915 | 0.2396 | 1  | 182913001 | 182913300 |
| EPC1          | -0.60 | 0.000017963 | 0.2396 | 10 | 32591101  | 32591400  |
| RHOT1         | -1.05 | 0.000017996 | 0.2396 | 17 | 30529201  | 30529500  |
| RPS6KA2       | -0.63 | 0.000018059 | 0.2396 | 6  | 166972201 | 166972500 |
| COA1          | 0.87  | 0.000018089 | 0.2396 | 7  | 43703101  | 43703400  |
| ZNF566        | 0.53  | 0.000018160 | 0.2396 | 19 | 36931501  | 36931800  |
| GML           | -0.76 | 0.000018266 | 0.2396 | 8  | 143915401 | 143915700 |
| FCRL5         | 0.68  | 0.000018300 | 0.2396 | 1  | 157342801 | 157343100 |
| SPTY2D1       | -0.94 | 0.000018310 | 0.2396 | 11 | 18686101  | 18686400  |
| WDR59         | 0.59  | 0.000018369 | 0.2396 | 16 | 74961901  | 74962200  |
| SUPT6H        | 0.34  | 0.000018525 | 0.2398 | 17 | 27018901  | 27019200  |
| C8orf59       | 0.53  | 0.000018545 | 0.2398 | 8  | 86136301  | 86136600  |
| ALMS1         | -1.01 | 0.000018736 | 0.2404 | 2  | 73633801  | 73634100  |
| TMEM72        | -0.93 | 0.000018753 | 0.2404 | 10 | 45429001  | 45429300  |
| RASSF9        | -0.70 | 0.000018885 | 0.2411 | 12 | 85991701  | 85992000  |
| MAN2B2        | -1.18 | 0.000019188 | 0.2439 | 4  | 6572101   | 6572400   |
| MYH16         | -0.92 | 0.000019320 | 0.2441 | 7  | 98907601  | 98907900  |
| RBP1          | -0.99 | 0.000019362 | 0.2441 | 3  | 139239001 | 139239300 |
| ROBO1         | 0.82  | 0.000019645 | 0.2447 | 3  | 79023301  | 79023600  |
| ZNF607        | 0.43  | 0.000019704 | 0.2447 | 19 | 38195401  | 38195700  |
| GRK4          | -0.97 | 0.000019803 | 0.2447 | 4  | 3024901   | 3025200   |
| RCC1          | 0.94  | 0.000019804 | 0.2447 | 1  | 28837801  | 28838100  |
| RP3-323P13.2  | 0.62  | 0.000019821 | 0.2447 | 6  | 134126701 | 134127000 |
| LYRM9         | 0.75  | 0.000020098 | 0.2466 | 17 | 26246101  | 26246400  |
| FBLN7         | -0.86 | 0.000020163 | 0.2466 | 2  | 112931401 | 112931700 |
| LRRN1         | -1.06 | 0.000020322 | 0.2466 | 3  | 3985801   | 3986100   |
| MMD2          | -0.85 | 0.000020343 | 0.2466 | 7  | 4931701   | 4932000   |
| ATP2B3        | -0.85 | 0.000020465 | 0.2466 | X  | 152806201 | 152806500 |
| COL4A1        | -0.54 | 0.000020496 | 0.2466 | 13 | 110879701 | 110880000 |
| AK9           | -0.59 | 0.000020673 | 0.2466 | 6  | 109818301 | 109818600 |
| USP17L17      | -0.34 | 0.000020707 | 0.2466 | 4  | 9242401   | 9242700   |
| FAM181B       | -0.52 | 0.000020711 | 0.2466 | 11 | 82428901  | 82429200  |
| PRKAA1        | 0.77  | 0.000020998 | 0.2469 | 5  | 40793701  | 40794000  |
| MME           | -0.83 | 0.000021015 | 0.2469 | 3  | 154518901 | 154519200 |
| OGDH          | 0.45  | 0.000021191 | 0.2469 | 7  | 44744701  | 44745000  |
| SEC61B        | -1.07 | 0.000021251 | 0.2469 | 9  | 102034201 | 102034500 |
| NAA15         | -0.80 | 0.000021294 | 0.2469 | 4  | 140262301 | 140262600 |
| SAT1          | -0.87 | 0.000021307 | 0.2469 | X  | 23784001  | 23784300  |
| RP11-347D21.3 | -0.57 | 0.000021395 | 0.2469 | 20 | 46750201  | 46750500  |
| AJAP1         | -1.12 | 0.000021401 | 0.2469 | 1  | 5202601   | 5202900   |
| DNAJC15       | -0.59 | 0.000021494 | 0.2471 | 13 | 43633801  | 43634100  |
| ARHGEF5       | -0.86 | 0.000021786 | 0.2477 | 7  | 144070801 | 144071100 |
| LINC01012     | -0.87 | 0.000021799 | 0.2477 | 6  | 27641101  | 27641400  |
| SEMA7A        | -0.45 | 0.000021802 | 0.2477 | 15 | 74710201  | 74710500  |
| RCSD1         | 0.64  | 0.000021911 | 0.2481 | 1  | 167575501 | 167575800 |
| FAM19A1       | 0.98  | 0.000022069 | 0.2487 | 3  | 68126701  | 68127000  |
| ERVV-2        | 0.72  | 0.000022188 | 0.2487 | 19 | 53539201  | 53539500  |
| ST3GAL6       | 0.72  | 0.000022218 | 0.2487 | 3  | 98504701  | 98505000  |
| FER           | 1.22  | 0.000022480 | 0.2490 | 5  | 108163501 | 108163800 |
| HS3ST4        | -0.93 | 0.000022574 | 0.2490 | 16 | 25996801  | 25997100  |
| DCUN1D2       | -0.91 | 0.000022618 | 0.2490 | 13 | 114124501 | 114124800 |
| INTU          | 0.76  | 0.000022637 | 0.2490 | 4  | 127881601 | 127881900 |
| EYS           | -0.87 | 0.000022725 | 0.2490 | 6  | 64522801  | 64523100  |
| PTPRD         | 1.04  | 0.000022790 | 0.2490 | 9  | 8517001   | 8517300   |
| RSP02         | 1.07  | 0.000023034 | 0.2490 | 8  | 108963901 | 108964200 |
| CHST13        | -0.74 | 0.000023069 | 0.2490 | 3  | 126254401 | 126254700 |

|               |       |             |        |    |           |           |
|---------------|-------|-------------|--------|----|-----------|-----------|
| RP11-274B18.2 | -0.88 | 0.000023166 | 0.2490 | 9  | 71237701  | 71238000  |
| CAMK4         | 1.05  | 0.000023205 | 0.2490 | 5  | 110541601 | 110541900 |
| SELE          | -1.03 | 0.000023398 | 0.2490 | 1  | 169696201 | 169696500 |
| CA5A          | 0.50  | 0.000023520 | 0.2490 | 16 | 87956701  | 87957000  |
| LYZL4         | 1.11  | 0.000023601 | 0.2490 | 3  | 42431101  | 42431400  |
| RNF41         | -0.60 | 0.000023630 | 0.2490 | 12 | 56594401  | 56594700  |
| LTBP2         | 0.57  | 0.000023703 | 0.2490 | 14 | 75009301  | 75009600  |
| ZNF618        | -1.01 | 0.000023711 | 0.2490 | 9  | 116771401 | 116771700 |
| PRDM7         | -1.03 | 0.000023724 | 0.2490 | 16 | 90171601  | 90171900  |
| CTNNA3        | -0.79 | 0.000023736 | 0.2490 | 10 | 67641301  | 67641600  |
| MLLT10P1      | 0.85  | 0.000023968 | 0.2495 | 20 | 29651101  | 29651400  |
| AC131097.3    | 0.75  | 0.000024089 | 0.2495 | 2  | 243003601 | 243003900 |
| LSP1P3        | -0.94 | 0.000024221 | 0.2495 | 5  | 28830901  | 28831200  |
| NCOA1         | 0.48  | 0.000024233 | 0.2495 | 2  | 24711601  | 24711900  |
| ITM2B         | 0.80  | 0.000024535 | 0.2495 | 13 | 48743401  | 48743700  |
| RP11-638F5.1  | -0.61 | 0.000024687 | 0.2495 | 12 | 131677201 | 131677500 |
| BOK-AS1       | -0.82 | 0.000024794 | 0.2495 | 2  | 242490301 | 242490600 |
| TMCO6         | -1.02 | 0.000024867 | 0.2495 | 5  | 140022601 | 140022900 |
| KIF11         | 0.86  | 0.000024917 | 0.2495 | 10 | 94416301  | 94416600  |
| GPR39         | 0.91  | 0.000024966 | 0.2495 | 2  | 133312201 | 133312500 |
| GFRA1         | -0.67 | 0.000024998 | 0.2495 | 10 | 117872401 | 117872700 |
| GUCA1C        | 0.90  | 0.000025045 | 0.2495 | 3  | 108647401 | 108647700 |
| BCL6          | 1.00  | 0.000025077 | 0.2495 | 3  | 187635001 | 187635300 |
| ST8SIA5       | -0.86 | 0.000025092 | 0.2495 | 18 | 44325601  | 44325900  |
| RNF220        | 0.45  | 0.000025106 | 0.2495 | 1  | 45086401  | 45086700  |
| CDH22         | -0.88 | 0.000025112 | 0.2495 | 20 | 44839501  | 44839800  |
| CDH23         | -0.66 | 0.000025692 | 0.2540 | 10 | 73153501  | 73153800  |
| SLC8A1-AS1    | -0.99 | 0.000025738 | 0.2540 | 2  | 40242901  | 40243200  |
| PHOX2B        | -0.96 | 0.000025849 | 0.2542 | 4  | 41742001  | 41742300  |
| ENOPH1        | 0.38  | 0.000026255 | 0.2553 | 4  | 83365201  | 83365500  |
| INSC          | -0.77 | 0.000026478 | 0.2553 | 11 | 15566101  | 15566400  |
| EMP1          | -0.92 | 0.000026610 | 0.2553 | 12 | 13338001  | 13338300  |
| ABCB9         | -0.87 | 0.000026710 | 0.2553 | 12 | 123418501 | 123418800 |
| ALPK2         | 0.87  | 0.000026714 | 0.2553 | 18 | 56302501  | 56302800  |
| LOC101448202  | -0.92 | 0.000026859 | 0.2553 | 9  | 137713801 | 137714100 |
| DEFB131       | -1.11 | 0.000026884 | 0.2553 | 4  | 9443401   | 9443700   |
| ABLIM2        | -0.41 | 0.000027030 | 0.2553 | 4  | 8096101   | 8096400   |
| PLXNC1        | -1.13 | 0.000027057 | 0.2553 | 12 | 94689301  | 94689600  |
| ELAVL2        | 0.60  | 0.000027057 | 0.2553 | 9  | 23663401  | 23663700  |
| RNF6          | -0.63 | 0.000027155 | 0.2553 | 13 | 26729401  | 26729700  |
| SFRP1         | -0.78 | 0.000027369 | 0.2553 | 8  | 40987201  | 40987500  |
| MCHR2         | -0.75 | 0.000027625 | 0.2553 | 6  | 100423501 | 100423800 |
| MYB           | 0.80  | 0.000027639 | 0.2553 | 6  | 135499201 | 135499500 |
| LINC00323     | -0.71 | 0.000027639 | 0.2553 | 21 | 42425101  | 42425400  |
| ARHGAP1       | -0.86 | 0.000027661 | 0.2553 | 11 | 46698901  | 46699200  |
| RTN4          | -0.52 | 0.000027714 | 0.2553 | 2  | 55337701  | 55338000  |
| LOC100652824  | -0.77 | 0.000027728 | 0.2553 | 2  | 202951801 | 202952100 |
| KLHL29        | -1.24 | 0.000027856 | 0.2553 | 2  | 23871301  | 23871600  |
| TDRD3         | 0.50  | 0.000027869 | 0.2553 | 13 | 60891301  | 60891600  |
| SCAPER        | -1.02 | 0.000027882 | 0.2553 | 15 | 76857001  | 76857300  |
| AACS          | 0.89  | 0.000027900 | 0.2553 | 12 | 125636701 | 125637000 |
| AC007966.1    | -0.90 | 0.000027912 | 0.2553 | 2  | 186357301 | 186357600 |
| SLC14A2       | -0.83 | 0.000028049 | 0.2553 | 18 | 43189201  | 43189500  |
| USP17L15      | -0.45 | 0.000028078 | 0.2553 | 4  | 9237601   | 9237900   |
| LINC00948     | -0.90 | 0.000028317 | 0.2556 | 10 | 61507501  | 61507800  |
| UNC5D         | -0.67 | 0.000028354 | 0.2556 | 8  | 35696701  | 35697000  |
| VRK1          | 0.72  | 0.000028375 | 0.2556 | 14 | 97248601  | 97248900  |
| ZNF207        | 0.55  | 0.000028453 | 0.2556 | 17 | 30712801  | 30713100  |
| ZRANB3        | 1.37  | 0.000028567 | 0.2558 | 2  | 136260001 | 136260300 |
| CCDC7         | -1.02 | 0.000028818 | 0.2560 | 10 | 33075601  | 33075900  |
| SOD2          | 0.71  | 0.000028987 | 0.2560 | 6  | 159903601 | 159903900 |
| MYO1E         | 0.90  | 0.000029066 | 0.2560 | 15 | 59539201  | 59539500  |
| CDH4          | -0.85 | 0.000029150 | 0.2560 | 20 | 59969701  | 59970000  |
| ARNTL         | -0.77 | 0.000029163 | 0.2560 | 11 | 13200901  | 13201200  |
| STIM2         | 1.19  | 0.000029216 | 0.2560 | 4  | 27266701  | 27267000  |
| METTL11B      | 0.64  | 0.000029306 | 0.2560 | 1  | 170133001 | 170133300 |
| MIR548H3      | -0.83 | 0.000029335 | 0.2560 | 9  | 78211801  | 78212100  |
| ARL4C         | -1.10 | 0.000029383 | 0.2560 | 2  | 235381801 | 235382100 |
| DAGLB         | 0.33  | 0.000029493 | 0.2560 | 7  | 6491701   | 6492000   |
| ZBTB16        | -0.90 | 0.000029523 | 0.2560 | 11 | 114015001 | 114015300 |

|               |       |             |        |    |           |           |
|---------------|-------|-------------|--------|----|-----------|-----------|
| MIR3659       | -0.81 | 0.000029847 | 0.2580 | 1  | 38585401  | 38585700  |
| MIR4283-2     | -0.61 | 0.000030094 | 0.2590 | 7  | 57015001  | 57015300  |
| L3MBTL4       | 0.85  | 0.000030134 | 0.2590 | 18 | 6462601   | 6462900   |
| SPIN1         | -0.51 | 0.000030439 | 0.2599 | 9  | 91116601  | 91116900  |
| NPHP3-ACAD11  | 0.55  | 0.000030465 | 0.2599 | 3  | 132305701 | 132306000 |
| SLC24A4       | -0.40 | 0.000030496 | 0.2599 | 14 | 92718901  | 92719200  |
| SYBU          | -1.19 | 0.000030673 | 0.2604 | 8  | 110703301 | 110703600 |
| AGAP1         | -0.79 | 0.000030730 | 0.2604 | 2  | 236745901 | 236746200 |
| FAM220A       | 0.34  | 0.000031161 | 0.2630 | 7  | 6346801   | 6347100   |
| USP17L25      | -0.35 | 0.000031213 | 0.2630 | 4  | 9337801   | 9338100   |
| DEPDC1        | 0.49  | 0.000031561 | 0.2645 | 1  | 69127201  | 69127500  |
| LPP           | -0.55 | 0.000031608 | 0.2645 | 3  | 187878001 | 187878300 |
| CAPZA3        | -0.89 | 0.000031683 | 0.2645 | 12 | 18906301  | 18906600  |
| PIP5K1C       | 0.39  | 0.000032006 | 0.2645 | 19 | 3639001   | 3639300   |
| LRBA          | 1.03  | 0.000032017 | 0.2645 | 4  | 151751701 | 151752000 |
| NMNAT3        | -0.69 | 0.000032030 | 0.2645 | 3  | 139509301 | 139509600 |
| CHRNA4        | 0.46  | 0.000032136 | 0.2645 | 20 | 62014201  | 62014500  |
| ARL6IP6       | -0.94 | 0.000032495 | 0.2645 | 2  | 153647101 | 153647400 |
| B3GALT1       | -0.88 | 0.000032511 | 0.2645 | 2  | 168584401 | 168584700 |
| QRFP          | 0.88  | 0.000032555 | 0.2645 | 4  | 122203501 | 122203800 |
| C2orf54       | 0.41  | 0.000032559 | 0.2645 | 2  | 241829101 | 241829400 |
| GALNT14       | 0.34  | 0.000032587 | 0.2645 | 2  | 31120201  | 31120500  |
| RASAL2        | -0.98 | 0.000032623 | 0.2645 | 1  | 178338001 | 178338300 |
| MIR563        | 0.69  | 0.000032689 | 0.2645 | 3  | 15921001  | 15921300  |
| LOC102577424  | 0.71  | 0.000032871 | 0.2645 | 5  | 176157901 | 176158200 |
| ARHGAP36      | -0.92 | 0.000033002 | 0.2645 | X  | 130298701 | 130299000 |
| ADAM22        | -0.86 | 0.000033065 | 0.2645 | 7  | 87640801  | 87641100  |
| FAM25G        | -0.91 | 0.000033071 | 0.2645 | 10 | 47179201  | 47179500  |
| DENND1A       | 0.80  | 0.000033236 | 0.2645 | 9  | 126155701 | 126156000 |
| CLEC14A       | -0.50 | 0.000033242 | 0.2645 | 14 | 38956801  | 38957100  |
| TAF4B         | 0.52  | 0.000033244 | 0.2645 | 18 | 23908801  | 23909100  |
| RARRES1       | -0.81 | 0.000033673 | 0.2670 | 3  | 158438101 | 158438400 |
| AL109763.2    | -0.87 | 0.000033775 | 0.2670 | 21 | 19866001  | 19866300  |
| MCU           | 0.72  | 0.000033822 | 0.2670 | 10 | 74457301  | 74457600  |
| KIF3B         | 0.89  | 0.000034161 | 0.2687 | 20 | 30886201  | 30886500  |
| SNCG          | -0.53 | 0.000034215 | 0.2687 | 10 | 88721401  | 88721700  |
| CERCAM        | 0.77  | 0.000034606 | 0.2706 | 9  | 131199001 | 131199300 |
| ADAMTS2       | -0.41 | 0.000034642 | 0.2706 | 5  | 178789201 | 178789500 |
| BAIAP2L2      | -0.77 | 0.000034804 | 0.2710 | 22 | 38498101  | 38498400  |
| ADCYAP1R1     | 0.99  | 0.000034956 | 0.2710 | 7  | 31169401  | 31169700  |
| CRTC2         | -1.33 | 0.000034963 | 0.2710 | 1  | 153920401 | 153920700 |
| RBM42         | -0.94 | 0.000035146 | 0.2717 | 19 | 36121801  | 36122100  |
| ACTR3BP2      | 1.09  | 0.000035331 | 0.2718 | 2  | 92202301  | 92202600  |
| ARHGEF10      | -0.97 | 0.000035340 | 0.2718 | 8  | 1823701   | 1824000   |
| APOD          | 0.55  | 0.000035423 | 0.2718 | 3  | 195296401 | 195296700 |
| DNAH8         | -0.86 | 0.000036000 | 0.2755 | 6  | 38851801  | 38852100  |
| LITAF         | -0.83 | 0.000036332 | 0.2763 | 16 | 11613901  | 11614200  |
| RP11-69H14.6  | 0.87  | 0.000036344 | 0.2763 | 15 | 22314601  | 22314900  |
| RFC1          | 1.27  | 0.000036557 | 0.2763 | 4  | 39359101  | 39359400  |
| RBMX          | 0.63  | 0.000036566 | 0.2763 | X  | 136023601 | 136023900 |
| RAB2A         | 0.72  | 0.000036809 | 0.2763 | 8  | 61516501  | 61516800  |
| DMAP1         | -0.75 | 0.000036910 | 0.2763 | 1  | 44682001  | 44682300  |
| PDE8B         | -1.00 | 0.000036937 | 0.2763 | 5  | 76615201  | 76615500  |
| TRIM16L       | 0.55  | 0.000036976 | 0.2763 | 17 | 18607201  | 18607500  |
| MSN           | 0.84  | 0.000037103 | 0.2763 | X  | 65087101  | 65087400  |
| PLD5          | 0.41  | 0.000037244 | 0.2763 | 1  | 242639401 | 242639700 |
| RP11-265P11.2 | -0.48 | 0.000037297 | 0.2763 | X  | 39435601  | 39435900  |
| RPTOR         | -0.51 | 0.000037359 | 0.2763 | 17 | 78594301  | 78594600  |
| NKIRAS1       | 0.55  | 0.000037379 | 0.2763 | 3  | 23937901  | 23938200  |
| KIT           | -0.85 | 0.000037438 | 0.2763 | 4  | 55446301  | 55446600  |
| RXRA          | -0.59 | 0.000037486 | 0.2763 | 9  | 137142601 | 137142900 |
| BDH1          | -1.05 | 0.000037717 | 0.2764 | 3  | 197314501 | 197314800 |
| KHDRBS3       | -0.77 | 0.000037811 | 0.2764 | 8  | 136611901 | 136612200 |
| KAT5          | -0.65 | 0.000037865 | 0.2764 | 11 | 65480701  | 65481000  |
| SND1          | -0.95 | 0.000037871 | 0.2764 | 7  | 127595701 | 127596000 |
| REEP3         | 0.79  | 0.000038269 | 0.2771 | 10 | 65621701  | 65622000  |
| MTF2          | 0.72  | 0.000038302 | 0.2771 | 1  | 93555901  | 93556200  |
| AASDH         | 0.60  | 0.000038318 | 0.2771 | 4  | 57236101  | 57236400  |
| LINC01029     | -0.92 | 0.000038333 | 0.2771 | 18 | 75636901  | 75637200  |
| SPATA16       | -0.84 | 0.000038476 | 0.2774 | 3  | 172875601 | 172875900 |

|               |       |             |        |    |           |           |
|---------------|-------|-------------|--------|----|-----------|-----------|
| PARP11        | -1.01 | 0.000038563 | 0.2774 | 12 | 3903001   | 3903300   |
| LRIG1         | -0.96 | 0.000038843 | 0.2786 | 3  | 66789001  | 66789300  |
| ACKR3         | -0.54 | 0.000039083 | 0.2786 | 2  | 237501301 | 237501600 |
| GRIN3A        | -0.96 | 0.000039093 | 0.2786 | 9  | 104559301 | 104559600 |
| ZNF254        | 0.97  | 0.000039096 | 0.2786 | 19 | 24326701  | 24327000  |
| PPP2R3B       | 0.65  | 0.000039384 | 0.2794 | Y  | 404701    | 405000    |
| RP11-730N24.1 | 1.01  | 0.000039398 | 0.2794 | 5  | 24892201  | 24892500  |
| CCDC71L       | -0.92 | 0.000039782 | 0.2815 | 7  | 106164001 | 106164300 |
| TPI1          | -0.76 | 0.000040118 | 0.2827 | 12 | 6979201   | 6979500   |
| UBE2N         | 0.77  | 0.000040138 | 0.2827 | 12 | 93820801  | 93821100  |
| ADAMTS18      | 0.69  | 0.000040324 | 0.2833 | 16 | 77453701  | 77454000  |
| SLC5A1        | -0.85 | 0.000040465 | 0.2836 | 22 | 32452201  | 32452500  |
| TMEM232       | -0.97 | 0.000040919 | 0.2847 | 5  | 109856101 | 109856400 |
| SLC25A26      | -0.91 | 0.000040924 | 0.2847 | 3  | 66349801  | 66350100  |
| OAT           | 0.75  | 0.000040945 | 0.2847 | 10 | 126040501 | 126040800 |
| MST1R         | -1.10 | 0.000041001 | 0.2847 | 3  | 49924501  | 49924800  |
| SH3BP2        | -0.55 | 0.000041330 | 0.2861 | 4  | 2808601   | 2808900   |
| STK32B        | -0.89 | 0.000041473 | 0.2861 | 4  | 5487301   | 5487600   |
| CDK19         | -0.97 | 0.000041551 | 0.2861 | 6  | 111129301 | 111129600 |
| HGS           | 0.30  | 0.000041630 | 0.2861 | 17 | 79657501  | 79657800  |
| NAIP          | -0.87 | 0.000041920 | 0.2861 | 5  | 70270801  | 70271100  |
| AFAP1         | 0.93  | 0.000042090 | 0.2861 | 4  | 7793701   | 7794000   |
| ELP3          | 0.53  | 0.000042094 | 0.2861 | 8  | 28107301  | 28107600  |
| CALB2         | -0.82 | 0.000042113 | 0.2861 | 16 | 71400901  | 71401200  |
| BTBD9         | -0.92 | 0.000042230 | 0.2861 | 6  | 38382301  | 38382600  |
| ADAMTSL1      | 0.54  | 0.000042261 | 0.2861 | 9  | 18567001  | 18567300  |
| OTX2          | 0.73  | 0.000042392 | 0.2861 | 14 | 57201901  | 57202200  |
| LINC00381     | -0.93 | 0.000042446 | 0.2861 | 13 | 75034501  | 75034800  |
| TCF7          | -0.94 | 0.000042540 | 0.2861 | 5  | 133446301 | 133446600 |
| FOXK1         | 0.79  | 0.000042832 | 0.2861 | 7  | 4706701   | 4707000   |
| SMAD9         | 0.48  | 0.000042992 | 0.2861 | 13 | 37476601  | 37476900  |
| CTR9          | -0.95 | 0.000043045 | 0.2861 | 11 | 10803001  | 10803300  |
| C1orf100      | 0.69  | 0.000043197 | 0.2861 | 1  | 244378501 | 244378800 |
| PTCHD3        | -0.67 | 0.000043257 | 0.2861 | 10 | 27676201  | 27676500  |
| CHMP1A        | -0.57 | 0.000043466 | 0.2861 | 16 | 89717701  | 89718000  |
| TPO           | 0.89  | 0.000043475 | 0.2861 | 2  | 1531201   | 1531500   |
| ACOT13        | 0.97  | 0.000043482 | 0.2861 | 6  | 24693601  | 24693900  |
| IGF1R         | 0.75  | 0.000043602 | 0.2861 | 15 | 99423301  | 99423600  |
| GLRX3         | -0.73 | 0.000043628 | 0.2861 | 10 | 132052801 | 132053100 |
| CCDC60        | 0.93  | 0.000043637 | 0.2861 | 12 | 119951401 | 119951700 |
| FLJ45079      | -0.92 | 0.000043834 | 0.2861 | 17 | 75913201  | 75913500  |
| MIR4478       | -0.91 | 0.000043946 | 0.2861 | 9  | 124878901 | 124879200 |
| FBXO47        | -0.82 | 0.000043990 | 0.2861 | 17 | 37110301  | 37110600  |
| USP17L25      | -0.59 | 0.000044001 | 0.2861 | 4  | 9351901   | 9352200   |
| C4orf51       | -0.78 | 0.000044029 | 0.2861 | 4  | 146605201 | 146605500 |
| ZNF354B       | -0.95 | 0.000044274 | 0.2861 | 5  | 178268101 | 178268400 |
| BCKDHB        | 0.41  | 0.000044305 | 0.2861 | 6  | 81197101  | 81197400  |
| RBM42         | -0.85 | 0.000044306 | 0.2861 | 19 | 36122101  | 36122400  |
| ACOT6         | 0.75  | 0.000044399 | 0.2861 | 14 | 74086501  | 74086800  |
| SAMD4A        | 0.61  | 0.000044440 | 0.2861 | 14 | 55142401  | 55142700  |
| GATS          | -0.90 | 0.000044617 | 0.2866 | 7  | 99853801  | 99854100  |
| ELF5          | -1.34 | 0.000044825 | 0.2869 | 11 | 34514701  | 34515000  |
| CDH6          | -1.70 | 0.000044869 | 0.2869 | 5  | 30495601  | 30495900  |
| ERCC5         | 1.00  | 0.000044993 | 0.2869 | 13 | 103500301 | 103500600 |
| CYTL1         | -0.77 | 0.000045037 | 0.2869 | 4  | 4991101   | 4991400   |
| NRP2          | 0.29  | 0.000045143 | 0.2869 | 2  | 206562301 | 206562600 |
| LINC00709     | 0.61  | 0.000045325 | 0.2874 | 10 | 9240601   | 9240900   |
| PTPRU         | -0.85 | 0.000045543 | 0.2874 | 1  | 29587201  | 29587500  |
| ARHGEF26-AS1  | -1.12 | 0.000045689 | 0.2874 | 3  | 153484201 | 153484500 |
| EPHA6         | -1.04 | 0.000045747 | 0.2874 | 3  | 97424101  | 97424400  |
| DENND5B       | 0.40  | 0.000045833 | 0.2874 | 12 | 31514701  | 31515000  |
| ENPEP         | 1.02  | 0.000045843 | 0.2874 | 4  | 111370801 | 111371100 |
| NRXN1         | -1.04 | 0.000045892 | 0.2874 | 2  | 51196201  | 51196500  |
| ZIC3          | -0.66 | 0.000046043 | 0.2878 | X  | 136995901 | 136996200 |
| ACVR1C        | 0.99  | 0.000046353 | 0.2891 | 2  | 158526601 | 158526900 |
| KRT16P1       | -0.85 | 0.000046553 | 0.2892 | 17 | 18336901  | 18337200  |
| APLF          | 1.15  | 0.000046558 | 0.2892 | 2  | 68741101  | 68741400  |
| CD1D          | -1.13 | 0.000046702 | 0.2895 | 1  | 158157001 | 158157300 |
| ADRB1         | 0.33  | 0.000046864 | 0.2899 | 10 | 115764301 | 115764600 |
| PLS3          | -0.86 | 0.000047215 | 0.2912 | X  | 115014601 | 115014900 |

|               |       |             |        |    |           |           |
|---------------|-------|-------------|--------|----|-----------|-----------|
| AK8           | -0.68 | 0.000047268 | 0.2912 | 9  | 135715201 | 135715500 |
| ZNF346        | 0.40  | 0.000047516 | 0.2915 | 5  | 176454001 | 176454300 |
| CNIH4         | 0.58  | 0.000047520 | 0.2915 | 1  | 224547601 | 224547900 |
| DNAH6         | -0.53 | 0.000047729 | 0.2920 | 2  | 84889201  | 84889500  |
| SHC3          | 0.73  | 0.000047887 | 0.2920 | 9  | 91711801  | 91712100  |
| ZNF667        | -0.90 | 0.000047898 | 0.2920 | 19 | 56950801  | 56951100  |
| ZNF45         | 0.34  | 0.000047992 | 0.2920 | 19 | 44424901  | 44425200  |
| ERG           | 0.73  | 0.000048352 | 0.2926 | 21 | 39735001  | 39735300  |
| CTD-2258A20.5 | -0.76 | 0.000048480 | 0.2926 | 16 | 66507601  | 66507900  |
| UNC5D         | -1.04 | 0.000048486 | 0.2926 | 8  | 35809201  | 35809500  |
| IL19          | -0.74 | 0.000048573 | 0.2926 | 1  | 207020401 | 207020700 |
| SEZ6          | -0.67 | 0.000048579 | 0.2926 | 17 | 27300901  | 27301200  |
| GTF2IRD1      | -0.36 | 0.000048824 | 0.2935 | 7  | 73962301  | 73962600  |
| OGFRL1        | 0.75  | 0.000049140 | 0.2948 | 6  | 71906401  | 71906700  |
| FBXL7         | 0.30  | 0.000049347 | 0.2950 | 5  | 15937201  | 15937500  |
| MYCN          | 0.62  | 0.000049364 | 0.2950 | 2  | 16260001  | 16260300  |
| GRIK3         | -0.83 | 0.000049622 | 0.2955 | 1  | 37297801  | 37298100  |
| LINC00701     | 0.94  | 0.000049647 | 0.2955 | 10 | 2732401   | 2732700   |
| ZFP69B        | 0.68  | 0.000049765 | 0.2955 | 1  | 40927501  | 40927800  |
| RAPGEF4       | 0.76  | 0.000050145 | 0.2955 | 2  | 173851501 | 173851800 |
| PDSS2         | 0.75  | 0.000050215 | 0.2955 | 6  | 107474701 | 107475000 |
| ID4           | -0.99 | 0.000050326 | 0.2955 | 6  | 19353601  | 19353900  |
| MRGPRF        | 0.68  | 0.000050406 | 0.2955 | 11 | 68763001  | 68763300  |
| SMOC1         | -0.57 | 0.000050450 | 0.2955 | 14 | 70306201  | 70306500  |
| USP42         | 0.59  | 0.000050617 | 0.2955 | 7  | 6137401   | 6137700   |
| CACNA1G       | -0.56 | 0.000050898 | 0.2955 | 17 | 48648001  | 48648300  |
| FAM118A       | 0.73  | 0.000050954 | 0.2955 | 22 | 45733501  | 45733800  |
| DDR2          | 0.65  | 0.000050977 | 0.2955 | 1  | 162627301 | 162627600 |
| SCRT2         | -0.77 | 0.000051006 | 0.2955 | 20 | 681601    | 681900    |
| MIR100HG      | -0.70 | 0.000051095 | 0.2955 | 11 | 122073901 | 122074200 |
| SGCD          | -0.94 | 0.000051145 | 0.2955 | 5  | 156124501 | 156124800 |
| SCYL3         | 0.89  | 0.000051157 | 0.2955 | 1  | 169824901 | 169825200 |
| TIAM2         | -0.93 | 0.000051261 | 0.2955 | 6  | 155436001 | 155436300 |
| FBXO32        | 0.56  | 0.000051265 | 0.2955 | 8  | 124542901 | 124543200 |
| GSTA4         | -0.82 | 0.000051319 | 0.2955 | 6  | 52809901  | 52810200  |
| CHAC1         | 0.42  | 0.000051527 | 0.2956 | 15 | 41250901  | 41251200  |
| TEX15         | 0.72  | 0.000051861 | 0.2956 | 8  | 30688801  | 30689100  |
| ATP4A         | 0.79  | 0.000051973 | 0.2956 | 19 | 36071701  | 36072000  |
| CASC17        | 0.82  | 0.000052048 | 0.2956 | 17 | 69140701  | 69141000  |
| ZNF585B       | -0.89 | 0.000052246 | 0.2956 | 19 | 37669801  | 37670100  |
| COL23A1       | 0.55  | 0.000052325 | 0.2956 | 5  | 177915301 | 177915600 |
| EDC3          | 0.35  | 0.000052405 | 0.2956 | 15 | 74944501  | 74944800  |
| PCED1B        | -0.86 | 0.000052416 | 0.2956 | 12 | 47718601  | 47718900  |
| CT64          | -0.81 | 0.000052472 | 0.2956 | 3  | 162383101 | 162383400 |
| CT64          | 1.01  | 0.000052512 | 0.2956 | 3  | 163671901 | 163672200 |
| CDK3          | -0.47 | 0.000052615 | 0.2956 | 17 | 73998301  | 73998600  |
| ANKS1B        | -0.79 | 0.000052640 | 0.2956 | 12 | 100354801 | 100355100 |
| ZNF534        | -0.70 | 0.000052689 | 0.2956 | 19 | 52948501  | 52948800  |
| KL            | 0.77  | 0.000052710 | 0.2956 | 13 | 33560401  | 33560700  |
| MGMT          | -0.83 | 0.000053412 | 0.2989 | 10 | 131045401 | 131045700 |
| RSP02         | 0.67  | 0.000053536 | 0.2991 | 8  | 109098901 | 109099200 |
| SNRPA         | 0.51  | 0.000053945 | 0.3008 | 19 | 41272801  | 41273100  |
| LINC00963     | 0.36  | 0.000054470 | 0.3029 | 9  | 132262501 | 132262800 |
| SEC14L1       | 0.64  | 0.000054531 | 0.3029 | 17 | 75015601  | 75015900  |
| SERINC2       | -0.89 | 0.000054807 | 0.3039 | 1  | 31926601  | 31926900  |
| KRT7          | -0.66 | 0.000055063 | 0.3040 | 12 | 52626001  | 52626300  |
| ZNF208        | 0.94  | 0.000055066 | 0.3040 | 19 | 22177501  | 22177800  |
| REG3G         | -0.86 | 0.000055117 | 0.3040 | 2  | 79206301  | 79206600  |
| ZNF626        | -0.83 | 0.000055295 | 0.3043 | 19 | 20893801  | 20894100  |
| AQP2          | -0.68 | 0.000055419 | 0.3043 | 12 | 50335801  | 50336100  |
| SAPCD2        | 0.72  | 0.000055641 | 0.3043 | 9  | 139966201 | 139966500 |
| SPATA31A3     | -0.70 | 0.000055689 | 0.3043 | 9  | 40348801  | 40349100  |
| B4GALNT3      | -0.48 | 0.000055931 | 0.3043 | 12 | 669001    | 669300    |
| CDHR2         | 0.58  | 0.000055993 | 0.3043 | 5  | 176014201 | 176014500 |
| LINC00879     | -0.98 | 0.000055995 | 0.3043 | 3  | 94845001  | 94845300  |
| USP17L25      | -0.49 | 0.000055999 | 0.3043 | 4  | 9352201   | 9352500   |
| ATRX          | -0.53 | 0.000056231 | 0.3050 | X  | 77052601  | 77052900  |
| MRPL15        | -0.90 | 0.000056477 | 0.3058 | 8  | 55119301  | 55119600  |
| NAMPT         | -0.91 | 0.000056891 | 0.3072 | 7  | 105876601 | 105876900 |
| PFKP          | -0.98 | 0.000057034 | 0.3072 | 10 | 3075301   | 3075600   |

|               |       |             |        |    |           |           |
|---------------|-------|-------------|--------|----|-----------|-----------|
| GRID2         | -1.06 | 0.000057044 | 0.3072 | 4  | 92967301  | 92967600  |
| RIMBP2        | -0.47 | 0.000057781 | 0.3103 | 12 | 131075701 | 131076000 |
| IMPG2         | -0.95 | 0.000057812 | 0.3103 | 3  | 100926601 | 100926900 |
| NR3C2         | 0.59  | 0.000057929 | 0.3103 | 4  | 149109901 | 149110200 |
| MIR138-1      | -1.00 | 0.000058026 | 0.3103 | 3  | 44203801  | 44204100  |
| C20orf26      | 0.84  | 0.000058573 | 0.3127 | 20 | 20073901  | 20074200  |
| ARL6IP6       | -1.01 | 0.000058704 | 0.3128 | 2  | 153594901 | 153595200 |
| C1orf189      | 0.68  | 0.000058821 | 0.3129 | 1  | 154168801 | 154169100 |
| KIAA1257      | 0.40  | 0.000059028 | 0.3134 | 3  | 128709301 | 128709600 |
| XPNPEP2       | -0.76 | 0.000059201 | 0.3138 | X  | 128831701 | 128832000 |
| KIAA0556      | -0.67 | 0.000059457 | 0.3146 | 16 | 27776401  | 27776700  |
| CLPSL2        | -0.69 | 0.000059763 | 0.3151 | 6  | 35745601  | 35745900  |
| SLC6A16       | 0.40  | 0.000059769 | 0.3151 | 19 | 49811401  | 49811700  |
| DIRC3         | 0.67  | 0.000060060 | 0.3161 | 2  | 217940701 | 217941000 |
| KCNA3         | -0.97 | 0.000060415 | 0.3173 | 1  | 111260401 | 111260700 |
| ZMYND8        | 0.64  | 0.000060589 | 0.3173 | 20 | 45958201  | 45958500  |
| SPATA31A2     | -0.67 | 0.000060608 | 0.3173 | 9  | 39865201  | 39865500  |
| FLJ33534      | -0.93 | 0.000060943 | 0.3185 | 2  | 11213101  | 11213400  |
| USP17L21      | -0.55 | 0.000061097 | 0.3186 | 4  | 9224401   | 9224700   |
| B4GALNT2      | 0.82  | 0.000061167 | 0.3186 | 17 | 47216401  | 47216700  |
| AC072062.1    | -0.86 | 0.000061553 | 0.3200 | 2  | 215710201 | 215710500 |
| YIPF3         | -0.84 | 0.000061979 | 0.3207 | 6  | 43483201  | 43483500  |
| CSNK1A1L      | 0.78  | 0.000061985 | 0.3207 | 13 | 37854901  | 37855200  |
| STPG1         | -0.96 | 0.000061996 | 0.3207 | 1  | 24699601  | 24699900  |
| ADAMTS2       | 0.43  | 0.000062281 | 0.3210 | 5  | 178684201 | 178684500 |
| RPL7          | -0.74 | 0.000062375 | 0.3210 | 8  | 74188501  | 74188800  |
| RP11-115J16.1 | -0.82 | 0.000062617 | 0.3210 | 8  | 9125101   | 9125400   |
| AGAP1         | -0.73 | 0.000062619 | 0.3210 | 2  | 236216401 | 236216700 |
| RNPEPL1       | -1.51 | 0.000062646 | 0.3210 | 2  | 241518901 | 241519200 |
| CADM1         | -0.70 | 0.000062981 | 0.3210 | 11 | 115033201 | 115033500 |
| MAP3K8        | 0.59  | 0.000063337 | 0.3210 | 10 | 30702901  | 30703200  |
| UTRN          | 0.87  | 0.000063390 | 0.3210 | 6  | 144668701 | 144669000 |
| MKI67         | 0.71  | 0.000063392 | 0.3210 | 10 | 130502701 | 130503000 |
| RPS6KA2       | 0.34  | 0.000063508 | 0.3210 | 6  | 166950001 | 166950300 |
| FHIT          | 0.80  | 0.000063537 | 0.3210 | 3  | 60487201  | 60487500  |
| SGK1          | 0.68  | 0.000063600 | 0.3210 | 6  | 134595301 | 134595600 |
| NRN1L         | 0.61  | 0.000063718 | 0.3210 | 16 | 67920901  | 67921200  |
| TMCO4         | -1.03 | 0.000063889 | 0.3210 | 1  | 20090101  | 20090400  |
| B3GALT1       | -1.16 | 0.000063919 | 0.3210 | 2  | 168646801 | 168647100 |
| POTEM         | 0.77  | 0.000063952 | 0.3210 | 14 | 19947901  | 19948200  |
| FAM118A       | 0.64  | 0.000064094 | 0.3210 | 22 | 45724501  | 45724800  |
| ZC3H18        | 0.50  | 0.000064201 | 0.3210 | 16 | 88626001  | 88626300  |
| DYRK1A        | -0.69 | 0.000064256 | 0.3210 | 21 | 38754001  | 38754300  |
| TFAP2C        | -0.75 | 0.000064362 | 0.3210 | 20 | 55452901  | 55453200  |
| RNPEPL1       | -0.93 | 0.000064442 | 0.3210 | 2  | 241519201 | 241519500 |
| TFAP2A        | -0.96 | 0.000064457 | 0.3210 | 6  | 9758401   | 9758700   |
| CRYGN         | -0.65 | 0.000064519 | 0.3210 | 7  | 151149301 | 151149600 |
| SLC13A4       | -0.88 | 0.000064642 | 0.3211 | 7  | 135398401 | 135398700 |
| PKNOX2        | -0.70 | 0.000064983 | 0.3219 | 11 | 125121901 | 125122200 |
| MTA1          | -0.65 | 0.000065030 | 0.3219 | 14 | 105921901 | 105922200 |
| LOC102031319  | 0.71  | 0.000065274 | 0.3222 | 10 | 32647501  | 32647800  |
| CACNA2D2      | -0.84 | 0.000065306 | 0.3222 | 3  | 50460001  | 50460300  |
| ERC2          | -0.73 | 0.000065979 | 0.3247 | 3  | 56298601  | 56298900  |
| TMEM181       | -0.82 | 0.000066025 | 0.3247 | 6  | 158969401 | 158969700 |
| GABRG1        | -0.91 | 0.000066282 | 0.3254 | 4  | 45763501  | 45763800  |
| GHITM         | 0.63  | 0.000066421 | 0.3254 | 10 | 85829401  | 85829700  |
| FMNL2         | 0.90  | 0.000066483 | 0.3254 | 2  | 153122101 | 153122400 |
| SNX5          | -0.63 | 0.000066874 | 0.3267 | 20 | 17900401  | 17900700  |
| TCERG1L       | -0.40 | 0.000067030 | 0.3270 | 10 | 132869401 | 132869700 |
| ZMIZ1-AS1     | -1.11 | 0.000067221 | 0.3271 | 10 | 80761201  | 80761500  |
| FIP1L1        | 1.08  | 0.000067608 | 0.3271 | 4  | 54250201  | 54250500  |
| CSNK1G1       | -0.42 | 0.000067619 | 0.3271 | 15 | 64611601  | 64611900  |
| PNLDC1        | 0.51  | 0.000067807 | 0.3271 | 6  | 160248901 | 160249200 |
| ZCCHC7        | -0.97 | 0.000067910 | 0.3271 | 9  | 37228801  | 37229100  |
| HDGFL1        | -0.89 | 0.000067958 | 0.3271 | 6  | 23348101  | 23348400  |
| MIR30D        | 0.91  | 0.000067984 | 0.3271 | 8  | 135981601 | 135981900 |
| LINC00708     | -0.90 | 0.000068040 | 0.3271 | 10 | 8727001   | 8727300   |
| LOC729737     | -1.21 | 0.000068101 | 0.3271 | 1  | 132901    | 133200    |
| NPAS2         | -0.87 | 0.000068404 | 0.3271 | 2  | 101441401 | 101441700 |
| HNRNPA0       | -0.86 | 0.000068443 | 0.3271 | 5  | 137109301 | 137109600 |

|               |       |             |        |    |           |           |
|---------------|-------|-------------|--------|----|-----------|-----------|
| LIFR-AS1      | -0.93 | 0.000068765 | 0.3271 | 5  | 38660401  | 38660700  |
| RNGTT         | -1.11 | 0.000068926 | 0.3271 | 6  | 89309401  | 89309700  |
| OTUD1         | -0.62 | 0.000069153 | 0.3271 | 10 | 23810401  | 23810700  |
| LINC00605     | -0.74 | 0.000069191 | 0.3271 | 14 | 103631401 | 103631700 |
| BAI1          | -0.90 | 0.000069210 | 0.3271 | 8  | 143540101 | 143540400 |
| AJAP1         | -0.84 | 0.000069210 | 0.3271 | 1  | 4773601   | 4773900   |
| MAPRE3        | -0.99 | 0.000069247 | 0.3271 | 2  | 27244501  | 27244800  |
| CITED2        | -0.70 | 0.000069284 | 0.3271 | 6  | 139718401 | 139718700 |
| DCTN1         | 0.45  | 0.000069446 | 0.3271 | 2  | 74582401  | 74582700  |
| RP11-536C10.7 | 0.82  | 0.000069608 | 0.3271 | 14 | 19396801  | 19397100  |
| RABEP1        | 0.29  | 0.000069696 | 0.3271 | 17 | 5173501   | 5173800   |
| NXNL2         | 0.62  | 0.000069848 | 0.3271 | 9  | 91146301  | 91146600  |
| NXN           | -0.52 | 0.000069859 | 0.3271 | 17 | 781501    | 781800    |
| TNS3          | -0.96 | 0.000070087 | 0.3271 | 7  | 47536501  | 47536800  |
| PRR16         | 0.85  | 0.000070096 | 0.3271 | 5  | 119397601 | 119397900 |
| MIR6085       | -0.73 | 0.000070112 | 0.3271 | 15 | 62759401  | 62759700  |
| IQGAP2        | -0.92 | 0.000070302 | 0.3271 | 5  | 75784501  | 75784800  |
| SDHAP3        | -0.97 | 0.000070312 | 0.3271 | 5  | 1580101   | 1580400   |
| FLJ12825      | 0.85  | 0.000070327 | 0.3271 | 12 | 54460201  | 54460500  |
| TPD52         | 0.87  | 0.000070468 | 0.3271 | 8  | 81117301  | 81117600  |
| GMSD          | 0.75  | 0.000070644 | 0.3271 | 6  | 2229601   | 2229900   |
| SRGAP3        | -0.96 | 0.000070653 | 0.3271 | 3  | 9033301   | 9033600   |
| CHRM3         | -1.07 | 0.000070764 | 0.3271 | 1  | 239422801 | 239423100 |
| C6orf48       | -1.22 | 0.000071008 | 0.3275 | 6  | 31811701  | 31812000  |
| FGF1          | -0.95 | 0.000071121 | 0.3275 | 5  | 141838201 | 141838500 |
| TTC8          | 1.01  | 0.000071179 | 0.3275 | 14 | 89433601  | 89433900  |
| VSTM4         | -0.78 | 0.000071327 | 0.3276 | 10 | 50208601  | 50208900  |
| PURB          | 0.42  | 0.000071501 | 0.3276 | 7  | 44956201  | 44956500  |
| PLXNA4        | 0.77  | 0.000071535 | 0.3276 | 7  | 132164401 | 132164700 |
| ARHGEF26-AS1  | -0.50 | 0.000071675 | 0.3278 | 3  | 153515401 | 153515700 |
| SNX30         | -0.71 | 0.000072126 | 0.3284 | 9  | 115569601 | 115569900 |
| LINC00669     | -0.58 | 0.000072205 | 0.3284 | 18 | 37257901  | 37258200  |
| LINC00398     | -0.90 | 0.000072226 | 0.3284 | 13 | 31393501  | 31393800  |
| CPNE5         | -0.65 | 0.000072256 | 0.3284 | 6  | 36754801  | 36755100  |
| DLGAP4        | -0.65 | 0.000072404 | 0.3285 | 20 | 35022601  | 35022900  |
| SPP1          | -0.85 | 0.000072486 | 0.3285 | 4  | 88862101  | 88862400  |
| CDK19         | -0.89 | 0.000073173 | 0.3301 | 6  | 111001801 | 111002100 |
| CTPS2         | 0.62  | 0.000073209 | 0.3301 | X  | 16733101  | 16733400  |
| ERCC4         | -0.81 | 0.000073277 | 0.3301 | 16 | 14097301  | 14097600  |
| PET112        | 0.60  | 0.000073292 | 0.3301 | 4  | 152847901 | 152848200 |
| ZCCHC7        | -0.74 | 0.000073671 | 0.3313 | 9  | 37371301  | 37371600  |
| LPHN2         | -1.09 | 0.000073837 | 0.3316 | 1  | 83242801  | 83243100  |
| DLG2          | -0.96 | 0.000074060 | 0.3320 | 11 | 83887801  | 83888100  |
| SLC39A11      | 0.68  | 0.000074493 | 0.3320 | 17 | 70698001  | 70698300  |
| LINC00645     | -0.97 | 0.000074643 | 0.3320 | 14 | 28636501  | 28636800  |
| EML5          | -0.82 | 0.000074705 | 0.3320 | 14 | 89110201  | 89110500  |
| OLFM1         | -0.99 | 0.000074728 | 0.3320 | 9  | 137965801 | 137966100 |
| LOC284344     | -1.01 | 0.000074850 | 0.3320 | 19 | 43751401  | 43751700  |
| GPT2          | -0.49 | 0.000074971 | 0.3320 | 16 | 46936201  | 46936500  |
| CDC42EP3      | 0.78  | 0.000074974 | 0.3320 | 2  | 37953001  | 37953300  |
| NMBR          | 0.62  | 0.000075016 | 0.3320 | 6  | 142157101 | 142157400 |
| LOC101927881  | 0.46  | 0.000075116 | 0.3320 | 2  | 129793201 | 129793500 |
| TDRD3         | -1.07 | 0.000075141 | 0.3320 | 13 | 60999601  | 60999900  |
| IL13RA1       | 0.60  | 0.000075350 | 0.3320 | X  | 117846601 | 117846900 |
| MTBP          | 0.91  | 0.000075444 | 0.3320 | 8  | 121481101 | 121481400 |
| LINC01140     | 0.45  | 0.000075477 | 0.3320 | 1  | 87707701  | 87708000  |
| FAM26F        | -0.81 | 0.000075620 | 0.3321 | 6  | 116775001 | 116775300 |
| COL5A1        | 0.35  | 0.000075956 | 0.3325 | 9  | 137439001 | 137439300 |
| COL6A2        | -0.97 | 0.000076127 | 0.3325 | 21 | 47481901  | 47482200  |
| AL109763.2    | -0.74 | 0.000076200 | 0.3325 | 21 | 20535901  | 20536200  |
| TBL1X         | -0.59 | 0.000076256 | 0.3325 | X  | 9515401   | 9515700   |
| IFITM3        | -0.90 | 0.000076786 | 0.3325 | 11 | 336301    | 336600    |
| GLIS1         | -0.94 | 0.000076796 | 0.3325 | 1  | 54155401  | 54155700  |
| KNTC1         | 0.64  | 0.000077202 | 0.3325 | 12 | 123108901 | 123109200 |
| PABPC4L       | -0.57 | 0.000077379 | 0.3325 | 4  | 135548401 | 135548700 |
| NELL1         | -0.96 | 0.000077400 | 0.3325 | 11 | 21396301  | 21396600  |
| LINC00702     | -0.59 | 0.000077437 | 0.3325 | 10 | 4198501   | 4198800   |
| ZNF516        | -0.49 | 0.000077526 | 0.3325 | 18 | 74067001  | 74067300  |
| RP11-138B4.1  | 0.90  | 0.000077566 | 0.3325 | 4  | 188529901 | 188530200 |
| RP3-513G18.2  | -0.99 | 0.000077618 | 0.3325 | 4  | 3701701   | 3702000   |

|                |       |             |        |    |           |           |
|----------------|-------|-------------|--------|----|-----------|-----------|
| MCOLN3         | 0.70  | 0.000077694 | 0.3325 | 1  | 85520401  | 85520700  |
| FHL2           | -0.87 | 0.000077723 | 0.3325 | 2  | 106082701 | 106083000 |
| SNRPN          | -0.53 | 0.000077749 | 0.3325 | 15 | 25176601  | 25176900  |
| PACRG          | 0.85  | 0.000077752 | 0.3325 | 6  | 163361701 | 163362000 |
| CDKL2          | -1.07 | 0.000077843 | 0.3325 | 4  | 76520701  | 76521000  |
| METTL16        | 0.71  | 0.000077912 | 0.3325 | 17 | 2404801   | 2405100   |
| TMEM184C       | -1.02 | 0.000077924 | 0.3325 | 4  | 148520701 | 148521000 |
| GCFC2          | 0.91  | 0.000078348 | 0.3339 | 2  | 76337701  | 76338000  |
| BRINP1         | 0.63  | 0.000078635 | 0.3340 | 9  | 121946101 | 121946400 |
| ACTL8          | 0.59  | 0.000078649 | 0.3340 | 1  | 18073501  | 18073800  |
| SCFD2          | -0.93 | 0.000078720 | 0.3340 | 4  | 53959201  | 53959500  |
| MIR548BA       | -0.59 | 0.000079179 | 0.3344 | 5  | 2014501   | 2014800   |
| TICRR          | 0.74  | 0.000079294 | 0.3344 | 15 | 90104101  | 90104400  |
| UGT2A1         | -1.09 | 0.000079528 | 0.3344 | 4  | 70462201  | 70462500  |
| ARL6IP6        | -1.30 | 0.000079609 | 0.3344 | 2  | 153777601 | 153777900 |
| DAG1           | 0.51  | 0.000079714 | 0.3344 | 3  | 49515301  | 49515600  |
| STARD8         | -0.68 | 0.000079788 | 0.3344 | X  | 67895101  | 67895400  |
| CD99P1         | -0.81 | 0.000079950 | 0.3344 | X  | 2586301   | 2586600   |
| RP1-60O19.1    | -0.79 | 0.000080080 | 0.3344 | 6  | 107289301 | 107289600 |
| NDUFB11        | 1.07  | 0.000080089 | 0.3344 | X  | 46987501  | 46987800  |
| GTF3C1         | 0.72  | 0.000080092 | 0.3344 | 16 | 27505201  | 27505500  |
| PPARD          | 0.39  | 0.000080125 | 0.3344 | 6  | 35325301  | 35325600  |
| CD320          | -0.66 | 0.000080150 | 0.3344 | 19 | 8358901   | 8359200   |
| RP11-421P23.1  | 0.80  | 0.000080302 | 0.3346 | 8  | 20542501  | 20542800  |
| DTWD2          | -0.75 | 0.000080553 | 0.3349 | 5  | 118345201 | 118345500 |
| C1orf21        | -0.75 | 0.000080601 | 0.3349 | 1  | 184535401 | 184535700 |
| CCNG2          | 0.87  | 0.000080808 | 0.3353 | 4  | 78040201  | 78040500  |
| MIR202HG       | -0.40 | 0.000081105 | 0.3357 | 10 | 135061501 | 135061800 |
| STK3           | 0.50  | 0.000081131 | 0.3357 | 8  | 99804601  | 99804900  |
| DNAH5          | 0.80  | 0.000081408 | 0.3364 | 5  | 13861801  | 13862100  |
| HNRNPD         | -0.65 | 0.000081524 | 0.3364 | 4  | 83283601  | 83283900  |
| ASAH2B         | 0.41  | 0.000081795 | 0.3371 | 10 | 52487701  | 52488000  |
| BOLA3          | 0.43  | 0.000082087 | 0.3376 | 2  | 74358001  | 74358300  |
| MIR548AJ2      | -0.95 | 0.000082150 | 0.3376 | 4  | 23174401  | 23174700  |
| PRPF4B         | 0.59  | 0.000082333 | 0.3379 | 6  | 3966901   | 3967200   |
| ZNF584         | 0.55  | 0.000082577 | 0.3380 | 19 | 58923301  | 58923600  |
| NR2C1          | 0.67  | 0.000082704 | 0.3380 | 12 | 95431501  | 95431800  |
| RHOB           | -0.90 | 0.000082756 | 0.3380 | 2  | 20672701  | 20673000  |
| PAX4           | -0.80 | 0.000082827 | 0.3380 | 7  | 127251001 | 127251300 |
| HGFAC          | -0.77 | 0.000082997 | 0.3380 | 4  | 3453001   | 3453300   |
| MIR5696        | -0.97 | 0.000083079 | 0.3380 | 2  | 101941201 | 101941500 |
| EFCAB6         | -0.46 | 0.000083162 | 0.3380 | 22 | 43938901  | 43939200  |
| UNC5C          | -0.76 | 0.000083393 | 0.3380 | 4  | 96190201  | 96190500  |
| RBBP7          | 0.94  | 0.000083441 | 0.3380 | X  | 16917601  | 16917900  |
| CSMD1          | 0.75  | 0.000083601 | 0.3380 | 8  | 4131601   | 4131900   |
| GRK4           | 0.74  | 0.000083700 | 0.3380 | 4  | 3002101   | 3002400   |
| FAM19A5        | -0.58 | 0.000083707 | 0.3380 | 22 | 48999601  | 48999900  |
| SLC2A3         | 0.63  | 0.000083841 | 0.3381 | 12 | 8126101   | 8126400   |
| PTPN9          | -0.61 | 0.000084030 | 0.3382 | 15 | 75794701  | 75795000  |
| CRLF2          | -0.52 | 0.000084096 | 0.3382 | Y  | 1294501   | 1294800   |
| DHRS3          | 0.51  | 0.000084243 | 0.3383 | 1  | 12633001  | 12633300  |
| GFPT1          | 0.63  | 0.000084771 | 0.3400 | 2  | 69563101  | 69563400  |
| CEP112         | 1.10  | 0.000085065 | 0.3404 | 17 | 63961501  | 63961800  |
| LOC643441      | 1.02  | 0.000085110 | 0.3404 | 1  | 113804401 | 113804700 |
| SDK1           | 0.36  | 0.000085669 | 0.3421 | 7  | 4342501   | 4342800   |
| PDE4A          | -0.75 | 0.000085848 | 0.3421 | 19 | 10547701  | 10548000  |
| BLCAP          | 0.95  | 0.000085987 | 0.3421 | 20 | 36096001  | 36096300  |
| ROBO1          | -1.09 | 0.000086083 | 0.3421 | 3  | 78450901  | 78451200  |
| TBC1D3P1-DHX40 | -0.63 | 0.000086245 | 0.3421 | 17 | 58052101  | 58052400  |
| GPHN           | -0.66 | 0.000086413 | 0.3421 | 14 | 67604101  | 67604400  |
| RP5-1166F10.1  | -0.68 | 0.000086428 | 0.3421 | 1  | 4388701   | 4389000   |
| MYOM3          | -0.69 | 0.000086513 | 0.3421 | 1  | 24399301  | 24399600  |
| ONECUT1        | 0.65  | 0.000086553 | 0.3421 | 15 | 53409301  | 53409600  |
| CT64           | 0.57  | 0.000086910 | 0.3431 | 3  | 163219501 | 163219800 |
| LRRCC1         | 0.94  | 0.000087282 | 0.3437 | 8  | 86060401  | 86060700  |
| POC5           | 0.35  | 0.000087302 | 0.3437 | 5  | 75141601  | 75141900  |
| TRIM60         | -0.87 | 0.000087871 | 0.3441 | 4  | 165966601 | 165966900 |
| APOH           | -0.71 | 0.000088117 | 0.3441 | 17 | 64207801  | 64208100  |
| TCERG1L        | -0.43 | 0.000088295 | 0.3441 | 10 | 132869101 | 132869400 |
| SLITRK1        | -0.61 | 0.000088507 | 0.3441 | 13 | 82738201  | 82738500  |



|                      |       |             |        |             |           |           |
|----------------------|-------|-------------|--------|-------------|-----------|-----------|
| <i>C10orf90</i>      | -0.53 | 0.000088731 | 0.3441 | 10          | 128151001 | 128151300 |
| <i>PRDM9</i>         | -0.71 | 0.000088742 | 0.3441 | 5           | 23997601  | 23997900  |
| <i>LOC100287015</i>  | 1.02  | 0.000088767 | 0.3441 | 8           | 5844601   | 5844900   |
| <i>NUCKS1</i>        | 1.10  | 0.000088952 | 0.3441 | 1           | 205695901 | 205696200 |
| <i>PTPN22</i>        | 0.85  | 0.000089018 | 0.3441 | 1           | 114395401 | 114395700 |
| <i>NFE2</i>          | 1.07  | 0.000089172 | 0.3441 | 12          | 54695401  | 54695700  |
| <i>RTF1</i>          | 0.76  | 0.000089941 | 0.3441 | 15          | 41703901  | 41704200  |
| <i>STK33</i>         | -0.73 | 0.000090099 | 0.3441 | 11          | 8404201   | 8404500   |
| <i>KIAA1432</i>      | -0.87 | 0.000090148 | 0.3441 | 9           | 5606701   | 5607000   |
| <i>CD109</i>         | -1.08 | 0.000090190 | 0.3441 | 6           | 74892901  | 74893200  |
| <i>LRRC59</i>        | 0.95  | 0.000090310 | 0.3441 | 17          | 48481201  | 48481500  |
| <i>CACNA1E</i>       | -1.13 | 0.000090707 | 0.3441 | 1           | 181405801 | 181406100 |
| <i>OCA2</i>          | 0.85  | 0.000090722 | 0.3441 | 15          | 28286101  | 28286400  |
| <i>TRAPPC11</i>      | 1.08  | 0.000090727 | 0.3441 | 4           | 184673401 | 184673700 |
| <i>TTLL4</i>         | 0.89  | 0.000090899 | 0.3441 | 2           | 219624901 | 219625200 |
| <i>WNT1</i>          | -0.84 | 0.000090946 | 0.3441 | 12          | 49375501  | 49375800  |
| <i>ZNF608</i>        | -0.92 | 0.000090990 | 0.3441 | 5           | 124031101 | 124031400 |
| <i>SPATA31A3</i>     | -0.75 | 0.000091029 | 0.3441 | 9           | 40675501  | 40675800  |
| <i>EYS</i>           | 0.84  | 0.000091166 | 0.3441 | 6           | 65384401  | 65384700  |
| <i>BUD13</i>         | -0.89 | 0.000091249 | 0.3441 | 11          | 116226001 | 116226300 |
| <i>LOC100506470</i>  | -1.02 | 0.000091278 | 0.3441 | 20          | 59676601  | 59676900  |
| <i>LEO1</i>          | 0.70  | 0.000091321 | 0.3441 | 15          | 52225801  | 52226100  |
| <i>CENPC</i>         | -0.92 | 0.000091407 | 0.3441 | 4           | 68184001  | 68184300  |
| <i>AXIN2</i>         | 0.46  | 0.000091481 | 0.3441 | 17          | 63541501  | 63541800  |
| <i>DGKB</i>          | -1.03 | 0.000091596 | 0.3441 | 7           | 14157601  | 14157900  |
| <i>LRRFIP1</i>       | -0.53 | 0.000091682 | 0.3441 | 2           | 238683901 | 238684200 |
| <i>SAMD4A</i>        | -0.77 | 0.000091876 | 0.3441 | 14          | 55089601  | 55089900  |
| <i>CBL</i>           | -0.61 | 0.000091886 | 0.3441 | 11          | 119143801 | 119144100 |
| <i>MIR205HG</i>      | 0.79  | 0.000091903 | 0.3441 | 1           | 209184901 | 209185200 |
| <i>EHMT1</i>         | -0.81 | 0.000092062 | 0.3441 | 9           | 140604601 | 140604900 |
| <i>AP000469.2</i>    | -1.01 | 0.000092124 | 0.3441 | 21          | 25439101  | 25439400  |
| <i>SYT4</i>          | 0.41  | 0.000092161 | 0.3441 | 18          | 41368201  | 41368500  |
| <i>INPP1</i>         | -1.08 | 0.000092314 | 0.3441 | 2           | 191243701 | 191244000 |
| <i>RP11-140I24.1</i> | 0.61  | 0.000092357 | 0.3441 | 16          | 73622401  | 73622700  |
| <i>UNC5D</i>         | -1.05 | 0.000092527 | 0.3441 | 8           | 34387801  | 34388100  |
| <i>ZNF707</i>        | 0.62  | 0.000092559 | 0.3441 | 8           | 144755701 | 144756000 |
| <i>CXorf57</i>       | -0.87 | 0.000092631 | 0.3441 | X           | 105736801 | 105737100 |
| <i>RP1-60O19.1</i>   | -0.53 | 0.000092646 | 0.3441 | 6           | 107163001 | 107163300 |
| <i>POLR3B</i>        | 0.50  | 0.000092678 | 0.3441 | 12          | 106746001 | 106746300 |
| <i>DSEL</i>          | 0.70  | 0.000092745 | 0.3441 | 18          | 65175601  | 65175900  |
| <i>XXYLT1</i>        | -0.46 | 0.000092772 | 0.3441 | 3           | 194964901 | 194965200 |
| <i>C3orf18</i>       | -0.94 | 0.000092788 | 0.3441 | 3           | 50591701  | 50592000  |
| <i>AGR2</i>          | 0.78  | 0.000092806 | 0.3441 | 7           | 16869901  | 16870200  |
| <i>EGFL6</i>         | -0.83 | 0.000092908 | 0.3441 | X           | 13518901  | 13519200  |
| <i>MAOA</i>          | -1.05 | 0.000093111 | 0.3441 | X           | 43317901  | 43318200  |
| <i>AKAP6</i>         | 0.67  | 0.000093207 | 0.3441 | 14          | 32787601  | 32787900  |
| <i>TTC34</i>         | -0.35 | 0.000093258 | 0.3441 | 1           | 2700301   | 2700600   |
| <i>ZFAND5</i>        | 0.65  | 0.000093520 | 0.3444 | 9           | 74990101  | 74990400  |
| <i>GRM7</i>          | -0.80 | 0.000093665 | 0.3444 | 3           | 7425901   | 7426200   |
| <i>SLC38A4</i>       | 0.48  | 0.000093670 | 0.3444 | 12          | 47218201  | 47218500  |
| <i>CNPY1</i>         | -0.46 | 0.000093886 | 0.3444 | 7           | 155307301 | 155307600 |
| <i>N6AMT1</i>        | 0.88  | 0.000093915 | 0.3444 | 21          | 30141601  | 30141900  |
| <i>LINC01139</i>     | 1.43  | 0.000094023 | 0.3444 | 1           | 238719001 | 238719300 |
| <i>ABHD6</i>         | -0.71 | 0.000094397 | 0.3454 | 3           | 58242301  | 58242600  |
|                      | -0.84 | 0.000094979 | 0.3459 | Un_gl000246 | 16801     | 17100     |
| <i>GRIK3</i>         | -0.95 | 0.000095071 | 0.3459 | 1           | 37278601  | 37278900  |
| <i>ABCB4</i>         | -0.72 | 0.000095135 | 0.3459 | 7           | 87035401  | 87035700  |
| <i>COL18A1</i>       | -0.66 | 0.000095137 | 0.3459 | 21          | 46915801  | 46916100  |
| <i>UBXN7</i>         | 0.68  | 0.000095144 | 0.3459 | 3           | 196132201 | 196132500 |
| <i>ATXN1L</i>        | 0.75  | 0.000095307 | 0.3459 | 16          | 71891701  | 71892000  |
| <i>ITGAM</i>         | 1.03  | 0.000095361 | 0.3459 | 16          | 31302301  | 31302600  |
| <i>TADA1</i>         | 0.68  | 0.000095511 | 0.3460 | 1           | 166842301 | 166842600 |
| <i>KIF13B</i>        | -0.70 | 0.000095662 | 0.3460 | 8           | 28917601  | 28917900  |
| <i>LINC00900</i>     | 0.88  | 0.000095802 | 0.3460 | 11          | 115881601 | 115881900 |
| <i>CKMT2-AS1</i>     | 0.82  | 0.000095907 | 0.3460 | 5           | 80546701  | 80547000  |
| <i>DHRS3</i>         | 0.44  | 0.000095958 | 0.3460 | 1           | 12633301  | 12633600  |
| <i>NAP1L4</i>        | -0.88 | 0.000096729 | 0.3484 | 11          | 2981401   | 2981700   |
| <i>BUD13</i>         | -0.63 | 0.000096938 | 0.3487 | 11          | 116428801 | 116429100 |
| <i>TSHZ2</i>         | 0.75  | 0.000097226 | 0.3493 | 20          | 51832201  | 51832500  |
| <i>AC010987.6</i>    | -1.05 | 0.000097691 | 0.3496 | 2           | 68060401  | 68060700  |

|                       |       |             |        |    |           |           |
|-----------------------|-------|-------------|--------|----|-----------|-----------|
| <i>SIDT1</i>          | 0.94  | 0.000097792 | 0.3496 | 3  | 113329201 | 113329500 |
| <i>RP5-1086L22.1</i>  | -0.34 | 0.000097960 | 0.3496 | 6  | 170552101 | 170552400 |
| <i>RFPL4B</i>         | -0.72 | 0.000097973 | 0.3496 | 6  | 112670701 | 112671000 |
| <i>RP11-1134I14.8</i> | -1.03 | 0.000098253 | 0.3496 | 8  | 48095101  | 48095400  |
| <i>VWA8</i>           | 0.47  | 0.000098254 | 0.3496 | 13 | 42534001  | 42534300  |
| <i>LOC401324</i>      | -1.01 | 0.000098271 | 0.3496 | 7  | 35488201  | 35488500  |
| <i>ZNF565</i>         | -0.70 | 0.000098291 | 0.3496 | 19 | 36692401  | 36692700  |
| <i>LOC100506746</i>   | -0.84 | 0.000098434 | 0.3496 | 4  | 87838801  | 87839100  |
| <i>CTNBL1</i>         | 0.89  | 0.000098568 | 0.3496 | 20 | 36372901  | 36373200  |
| <i>CYP4F2</i>         | 0.37  | 0.000098586 | 0.3496 | 19 | 15989401  | 15989700  |
| <i>SNRPC</i>          | -0.84 | 0.000098866 | 0.3501 | 6  | 34736101  | 34736400  |
| <i>YES1</i>           | 0.67  | 0.000098953 | 0.3501 | 18 | 815101    | 815400    |
| <i>RAB37</i>          | 0.71  | 0.000099247 | 0.3504 | 17 | 72722101  | 72722400  |
| <i>PTPRF</i>          | -0.66 | 0.000099287 | 0.3504 | 1  | 44080801  | 44081100  |
| <i>ASPG</i>           | 0.58  | 0.000099530 | 0.3509 | 14 | 104537701 | 104538000 |
| <i>ABTB2</i>          | 0.45  | 0.000099823 | 0.3515 | 11 | 34179901  | 34180200  |

---

**Table S4. A selection of the top results from the functional annotation analysis** that provides more evidence that Hi cortisol affect methylation near genes associated with nervous system and calcium transport, as well as hypomethylation.

| Category              | Association                                           | Genes                                                                                                                                                                                                                                                                                                                                                                                                                                                                                                                                                                                                                                                                                                                                    | Database              | Identifyer | Statistics                                                 |
|-----------------------|-------------------------------------------------------|------------------------------------------------------------------------------------------------------------------------------------------------------------------------------------------------------------------------------------------------------------------------------------------------------------------------------------------------------------------------------------------------------------------------------------------------------------------------------------------------------------------------------------------------------------------------------------------------------------------------------------------------------------------------------------------------------------------------------------------|-----------------------|------------|------------------------------------------------------------|
| <b>Nervous system</b> |                                                       |                                                                                                                                                                                                                                                                                                                                                                                                                                                                                                                                                                                                                                                                                                                                          |                       |            |                                                            |
|                       | Nervous system development                            | BDH1; ABLIM2; ACSL3; ADAM22; ATRX; ALMS1; APOD; ATG7; BAI1; CDH4; CDH23; CACNB2; CACNA1S; CACNA1G; CACNA1I; CTNNA1; CITED2; CADM1; CHAC1; CHRM3; COL4A1; COL5A1; COL6A2; CDK1; DLG2; DYRK1A; DCTN1; DAG1; FGF1; GFRA1; GRIN3A; GPM6A; ID4; INSC; IGF1R; ITM2B; ITGAM; INTU; KATNB1; KLHL1; KIF13B; LPHN2; MESP1; MCOLN3; NELL1; NGF; NRXN1; NRN1L; NPAS2; NRP2; NAIP; NCOA1; OLFM1; OTX2; OGDH; PHOX2B; PCM1; PPARD; PIP5K1C; PLXNA4; PLXNC1; PRDM6; PRNP; PICK1; PTPRD; PTPRF; RAPGEF4; RHOB; RGS14; RTN4; RXRA; ARHGEF10; RPS6KA2; RNF6; ROBO1; SFRP1; SPP1; SEZ6; SEMA4D; SEMA5A; SEMA7A; SERINC5; STK3; SHC3; SLITRK1; SMAD9; SCN8A; STRN; SOD2; THBS2; TCF7; TFAP2A; TFAP2C; TULP1; TP53BP2; UNC5C; UNC5D; MYCN; WNT1; ZIC3; ZBTB16 | GO biological process | GO:0007399 | C=1724; O=101; E=62.46; R=1.62; rawP=5.22e-07; adjP=0.0005 |
|                       | Neuron development                                    | ABLIM2; ALMS1; APOD; ATG7; BAI1; CDH4; CDH23; CACNB2; CACNA1S; CACNA1G; CACNA1I; CTNNA1; COL4A1; COL5A1; COL6A2; CDK1; DLG2; GFRA1; GRIN3A; GPM6A; IGF1R; KATNB1; KLHL1; KIF13B; NGF; NRXN1; NRP2; OTX2; OGDH; PHOX2B; PIP5K1C; PLXNA4; PLXNC1; PRNP; PICK1; PTPRD; PTPRF; RAPGEF4; RHOB; RTN4; RXRA; RPS6KA2; RNF6; ROBO1; SPP1; SEZ6; SEMA4D; SEMA5A; SEMA7A; SLITRK1; SCN8A; STRN; SOD2; TFAP2A; TULP1; UNC5C; UNC5D                                                                                                                                                                                                                                                                                                                  | GO biological process | GO:0048666 | C=798; O=57; E=28.91; R=1.97; rawP=6.69e-07; adjP=0.0005   |
|                       | Neurogenesis                                          | ABLIM2; ADAM22; ALMS1; APOD; ATG7; BAI1; CDH4; CDH23; CACNB2; CACNA1S; CACNA1G; CACNA1I; CTNNA1; CHAC1; COL4A1; COL5A1; COL6A2; CDK1; DLG2; DAG1; GFRA1; GRIN3A; GPM6A; ID4; IGF1R; ITGAM; KATNB1; KLHL1; KIF13B; MESP1; MCOLN3; NGF; NRXN1; NRP2; NCOA1; OTX2; OGDH; PHOX2B; PCM1; PIP5K1C; PLXNA4; PLXNC1; PRDM6; PRNP; PICK1; PTPRD; PTPRF; RAPGEF4; RHOB; RGS14; RTN4; RXRA; ARHGEF10; RPS6KA2; RNF6; ROBO1; SPP1; SEZ6; SEMA4D; SEMA5A; SEMA7A; SLITRK1; SCN8A; STRN; SOD2; TCF7; TFAP2A; TFAP2C; TULP1; UNC5C; UNC5D; MYCN; WNT1                                                                                                                                                                                                   | GO biological process | GO:0022008 | C=1140; O=73; E=41.30; R=1.77; rawP=1.12e-06; adjP=0.0007  |
|                       | Neuron projection development                         | ABLIM2; APOD; ATG7; BAI1; CDH4; CACNB2; CACNA1S; CACNA1G; CACNA1I; CTNNA1; COL4A1; COL5A1; COL6A2; CDK1; GFRA1; GRIN3A; GPM6A; IGF1R; KATNB1; KLHL1; KIF13B; NGF; NRXN1; NRP2; OTX2; PHOX2B; PIP5K1C; PLXNA4; PLXNC1; PRNP; PTPRD; PTPRF; RAPGEF4; RHOB; RTN4; RXRA; RPS6KA2; RNF6; ROBO1; SPP1; SEZ6; SEMA4D; SEMA5A; SEMA7A; SLITRK1; SCN8A; STRN; TULP1; UNC5C; UNC5D                                                                                                                                                                                                                                                                                                                                                                 | GO biological process | GO:0031175 | C=704; O=50; E=25.50; R=1.96; rawP=3.99e-06; adjP=0.0014   |
|                       | Neuron projection morphogenesis                       | ABLIM2; APOD; ATG7; BAI1; CDH4; CACNB2; CACNA1S; CACNA1G; CACNA1I; CTNNA1; COL4A1; COL5A1; COL6A2; CDK1; GFRA1; GPM6A; IGF1R; KIF13B; NGF; NRXN1; NRP2; OTX2; PHOX2B; PIP5K1C; PLXNA4; PLXNC1; PRNP; PTPRD; PTPRF; RHOB; RTN4; RXRA; RPS6KA2; RNF6; ROBO1; SPP1; SEMA4D; SEMA5A; SEMA7A; SLITRK1; SCN8A; UNC5C; UNC5D                                                                                                                                                                                                                                                                                                                                                                                                                    | GO biological process | GO:0048812 | C=583; O=43; E=21.12; R=2.04; rawP=7.71e-06; adjP=0.0016   |
|                       | Cell morphogenesis involved in neuron differentiation | ABLIM2; APOD; ATG7; BAI1; CDH4; CDH23; CACNB2; CACNA1S; CACNA1G; CACNA1I; CTNNA1; COL4A1; COL5A1; COL6A2; CDK1; GFRA1; IGF1R; KIF13B; NGF; NRXN1; NRP2; OTX2; PHOX2B; PIP5K1C; PLXNA4; PLXNC1; PRNP; PTPRD; PTPRF; RHOB; RTN4; RXRA; RPS6KA2; RNF6; ROBO1; SPP1; SEMA4D; SEMA5A; SEMA7A; SLITRK1; SCN8A; UNC5C; UNC5D                                                                                                                                                                                                                                                                                                                                                                                                                    | GO biological process | GO:0048667 | C=575; O=43; E=20.83; R=2.06; rawP=5.45e-06; adjP=0.0016   |

|                                         |                                                                                                                                                                                                                                                                                                                                                                       |                       |                |                                                            |
|-----------------------------------------|-----------------------------------------------------------------------------------------------------------------------------------------------------------------------------------------------------------------------------------------------------------------------------------------------------------------------------------------------------------------------|-----------------------|----------------|------------------------------------------------------------|
| Neuron projection                       | ADCYAP1R1; APBB2; ANKS1B; APOD; ATXN1; AXIN2; CTNND2; CADM1; CHRM3; CHRNA4; CPNE5; DENND1A; DLGAP4; DLG2; DAG1; ERC2; GRK4; GABBR2; GRID2; GRIK3; GRIN3A; GRM7; GPM6A; GNB2L1; IGF1R; KATNB1; KLHL1; KIF13B; MME; NRXN1; NRP2; OTX2; PICK1; PTPRF; RAPGEF4; RGS14; RPTOR; RTN4; RXRA; RNF6; ROBO1; SEZ6; SHANK2; SUMO1; SCN8A; SAMD4A; STRN; SYT4; SNCG; TIAM2; TPGS1 | GO cellular component | GO:0043005     | C=651; O=51; E=22.68; R=2.25; rawP=5.54e-08; adjP=1.86e-05 |
| Dendrite                                | ANKS1B; APOD; ATXN1; AXIN2; CTNND2; CADM1; CHRM3; CHRNA4; DENND1A; DLGAP4; DLG2; GRK4; GRID2; GRIK3; GRIN3A; GRM7; GPM6A; GNB2L1; KLHL1; MME; PICK1; RAPGEF4; RGS14; RPTOR; SEZ6; SHANK2; SUMO1; SAMD4A; STRN; TPGS1                                                                                                                                                  | GO cellular component | GO:0030425     | C=355; O=30; E=12.37; R=2.43; rawP=7.48e-06; adjP=0.0008   |
| Synaptic membrane                       | ANKS1B; CHRM3; CHRNA4; DENND1A; DLG2; DAG1; ERC2; GABRG1; GABBR2; GPHN; GRID2; GRIK3; GRIN3A; GRM7; NRXN1; PICK1; RIMS1; RGS14; SHANK2; STRN; UTRN                                                                                                                                                                                                                    | GO cellular component | GO:0097060     | C=215; O=21; E=7.49; R=2.80; rawP=2.11e-05; adjP=0.0012    |
| Synapse                                 | APBB2; ANKS1B; AXIN2; CDH23; CTNND2; CADM1; CHRM3; CHRNA4; DENND1A; DLGAP4; DLG2; DAG1; ERC2; GABRG1; GABBR2; GPHN; GRID2; GRIK3; GRIN3A; GRM7; MME; NRXN1; PICK1; PTPRF; RAPGEF4; RIMS1; RGS14; RIMBP2; SHANK2; SUMO1; SAMD4A; STRN; SYT4; SYTL4; TULP1; UTRN                                                                                                        | GO cellular component | GO:0045202     | C=489; O=36; E=17.03; R=2.11; rawP=2.06e-05; adjP=0.0012   |
| Synapse part                            | ANKS1B; AXIN2; CTNND2; CADM1; CHRM3; CHRNA4; DENND1A; DLG2; DAG1; ERC2; GABRG1; GABBR2; GPHN; GRID2; GRIK3; GRIN3A; GRM7; MME; NRXN1; PICK1; RIMS1; RGS14; SHANK2; STRN; SYT4; SYTL4; UTRN                                                                                                                                                                            | GO cellular component | GO:0044456     | C=370; O=27; E=12.89; R=2.09; rawP=0.0003; adjP=0.0126     |
| Neuronal cell body                      | APOD; CTNND2; CHRNA4; CPNE5; DENND1A; DLGAP4; DLG2; GRK4; GRIK3; GRIN3A; GPM6A; GNB2L1; KATNB1; KLHL1; PHAX; PTPRF; RAB2A; RPTOR; RTN4; ROBO1; STRN; SNCG                                                                                                                                                                                                             | GO cellular component | GO:0043025     | C=291; O=22; E=10.14; R=2.17; rawP=0.0006; adjP=0.0168     |
| Axon guidance                           | ABLIM2; EPHA6; PLXNC1; ROBO1; SEMA4D; SEMA5A; SEMA7A; SRGAP3; UNC5C; UNC5D                                                                                                                                                                                                                                                                                            | KEGG pathway          | 4360           | C=129; O=10; E=2.17; R=4.62; rawP=6.85e-05; adjP=0.0019    |
| Neuroactive ligand-receptor interaction | ADCYAP1R1; ADRB1; CHRM3; CHRNA4; GABRG1; GABBR2; GRID2; GRIK3; GRIN3A; GRM7; MCHR2; NMBR                                                                                                                                                                                                                                                                              | KEGG pathway          | 4080           | C=272; O=12; E=4.57; R=2.63; rawP=0.0024; adjP=0.0262      |
| Neural Crest Differentiation            | AXIN2; CDH6; PHOX2B; RHOB; TFAP2A; MYB; WNT1                                                                                                                                                                                                                                                                                                                          | Wiki pathways         | WP2064         | C=123; O=7; E=2.06; R=3.39; rawP=0.0049; adjP=0.0462       |
| Axon guidance                           | ABLIM2; CACNB2; CACNA1S; CACNA1G; CACNA1I; CDK1; GFRA1; NGF; NRP2; PIP5K1C; PLXNA4; PLXNC1; PRNP; RHOB; RPS6KA2; ROBO1; SEMA4D; SEMA5A; SEMA7A; UNC5C; UNC5D                                                                                                                                                                                                          | Pathway Commons       | DB_ID:20       | C=219; O=21; E=3.68; R=5.71; rawP=1.83e-10; adjP=3.29e-08  |
| Mental Disorders                        | ATRX; APBB2; APOD; RNPEPL1; ARNTL; BTBD9; CTNNA3; CRBN; CHRNA4; CNTN5; DYRK1A; GABRG1; GABBR2; GRIK3; GRIN3A; GRM7; GPM6A; IMMPP2L; INPP1; IDE; ITM2B; MME; MAOA; NGF; NRXN1; NPAS2; PKNOX2; PCM1; PER3; PRNP; PICK1; PTPRD; RTN4; SETBP1; SLITRK1                                                                                                                    | Disease association   | DB_ID:PA447208 | C=564; O=35; E=9.47; R=3.70; rawP=5.29e-11; adjP=2.32e-08  |
| Nervous System Diseases                 | ADAM22; ATRX; ALOX5AP; BAI1; BCKDHB; BTBD9; CDH23; CACNA1S; CTNNA3; CHRNA4; COL4A1; COL6A2; DYRK1A; DCTN1; DAG1; FBXO32; GTF2IRD1; IDE; ITM2B; LITAF; MME; NGF; NAIP; MGMT; OTX2; PHOX2B; PACRG; PER3; PRNP; RFC1; RTN4; SGCD; SLITRK1; SNRPN; SCN8A; TTC8; ATP8A1; CACNB2; CD109; CSMD1; ERC2; NELL1; PTPRD; SEMA5A; THSD4                                           | Disease association   | DB_ID:PA445093 | C=694; O=37; E=11.65; R=3.18; rawP=1.03e-09; adjP=2.26e-07 |
| Bupropion (antidepressant drug)         | ATP8A1; CACNB2; CD109; CSMD1; ERC2; NELL1; PTPRD; SEMA5A; THSD4                                                                                                                                                                                                                                                                                                       | Drug interaction      | DB_ID:PA448687 | C=108; O=9; E=1.81; R=4.96; rawP=9.00e-05; adjP=0.0027     |

## Calcium transport

|                                                |                                                                                                        |                       |            |                                                       |
|------------------------------------------------|--------------------------------------------------------------------------------------------------------|-----------------------|------------|-------------------------------------------------------|
| Calcium ion transmembrane transporter activity | ATP2B3; CACNA2D2; CACNB2; CACNA1S; CACNA1E; CACNA1G; CACNA1I; GRIN3A; GRM7; GPM6A; MCU; SLC24A2; STIM2 | GO molecular function | GO:0015085 | C=113; O=13; E=3.96; R=3.29; rawP=0.0002; adjP=0.0229 |
| Voltage-gated calcium channel activity         | CACNA2D2; CACNB2; CACNA1S; CACNA1E; CACNA1G; CACNA1I; GRM7                                             | GO molecular function | GO:0005245 | C=36; O=7; E=1.26; R=5.55; rawP=0.0002; adjP=0.0229   |
| Calcium channel activity                       | CACNA2D2; CACNB2; CACNA1S; CACNA1E; CACNA1G; CACNA1I; GRIN3A; GRM7; GPM6A; MCU; SLC24A2; STIM2         | GO molecular function | GO:0005262 | C=97; O=12; E=3.40; R=3.53; rawP=0.0001; adjP=0.0229  |
| Calcium channel complex                        | AKAP6; CACNA2D2; CACNB2; CACNA1S; CACNA1E; CACNA1G; CACNA1I                                            | GO cellular component | GO:0034704 | C=41; O=7; E=1.43; R=4.90; rawP=0.0005; adjP=0.0168   |
| Calcium Regulation in the Cardiac Cell         | ADRB1; ATP2B3; CACNA1S; CACNA1E; CAMK4; CHRM3; GRK4; RGS14                                             | Wikipathways pathway  | WP536      | C=151; O=8; E=2.53; R=3.16; rawP=0.0041; adjP=0.0451  |

## Epigenetic regulation

|                                  |                                                                         |                  |                   |                                                         |
|----------------------------------|-------------------------------------------------------------------------|------------------|-------------------|---------------------------------------------------------|
| Decitabine (hypomethylates DNA)  | CADM1; FHIT; ID4; RARRES1; ROBO1; SFRP1; SNCG; TEX15                    | Drug interaction | DB_ID:PA164749631 | C=79; O=8; E=1.33; R=6.03; rawP=5.55e-05; adjP=0.0020   |
| Azacitidine (hypomethylates DNA) | AXIN2; CADM1; ID4; MGMT; PAX4; PER3; RARRES1; ROBO1; SFRP1; SNCG; TEX15 | Drug interaction | DB_ID:PA451996    | C=103; O=11; E=1.73; R=6.36; rawP=1.36e-06; adjP=0.0002 |

Analysis was done using the WebGestalt functional gene annotation web tool.

Of the 852 DMR's 724 mapped to unique Entrez Gene IDs in the WebGestalt functional annotation tool.

C= number of reference genes in the category

O= number of genes in the gene set and also in the category

E= expected number in the category

R= ratio of enrichment

rawP= p value from hypergeometric test

adjp= p value adjusted by multiple test adjustment using BH method

**Table S5. Primers used for bisulfite pyrosequencing**

| <b>Assay</b> | <b>Primers*</b>               | <b>5' modification</b> | <b>Type of primer</b> | <b>Name of closest gene</b> |
|--------------|-------------------------------|------------------------|-----------------------|-----------------------------|
| 1            | TATGTTTTTGTATAGGGGAAATGATG    | None                   | PCR Forward           | BRCA1                       |
|              | CCAACATAATAAAACCCCACATCT      | Biotinylated           | PCR Reverse           | BRCA1                       |
|              | TGGTATAATTTTAGTTTAGTGTAAT     | None                   | Sequencing            | BRCA1                       |
| 2            | AGATGGGAAGGAAGAGAAAAGA        | None                   | PCR Forward           | CACNA1S                     |
|              | TACCTCCCCCTCCCACCATA          | Biotinylated           | PCR Reverse           | CACNA1S                     |
|              | AGTATGAGATGATGGTT             | None                   | Sequencing            | CACNA1S                     |
| 3            | TGTTGGGGTTATAGGTGTGAG         | None                   | PCR Forward           | PRDM14                      |
|              | AACCTATTAATCACTTCCTAAAATATACC | Biotinylated           | PCR Reverse           | PRDM14                      |
|              | GGTTATAGGTGTGAGT              | None                   | Sequencing            | PRDM14                      |

\* Cycling conditions for all assays: (1) Activation 15 min 95°C, (2) Cycling x45 Denaturaion 30 sec 94°C - Annealing 30 sec 56°C - Extension 30s 72°C, (3) Final extension 10 min 72°C
